# Supplementary material for: Reduction induced S-nucleophilicity in mono-dithiolene molybdenum complexes – in situ generation of sulfonium ligands
Source: Royal Society of Chemistry journal article supplement (doi:10.1039/d1cc05335c), 2021-01-01
Supplement: d1cc05335c1.pdf [file d1cc05335c1.pdf]

## Supporting Information

# Reduction induced S-nucleophilicity in mono-dithiolene molybdenum complexes - *in situ* generation of sulfonium ligands

Benedict J. Elvers,<sup>a</sup> Vera Krewald,<sup>b</sup> Carola Schulzke,<sup>a</sup> and Christian Fischer<sup>\*a</sup>

---

<sup>0a</sup> Address, Universität Greifswald, Institut für Biochemie, Felix-Hausdorff-Str. 4, Greifswald, Deutschland. Tel: +49 (0)3834 420 4444; E-mail: christian.fischer@uni-greifswald.de

<sup>0b</sup> Address, Technische Universität Darmstadt, Fachbereich Chemie, Theoretische Chemie, Alarich-Weiss-Str. 4, 64287 Darmstadt, Deutschland. Phone: +49 (0)6151 16-21650; E-mail: krewald@chemie.tu-darmstadt.de

# 1 Experimental Details

## 1.1 General Procedures

All measurements were carried out in a dry argon atmosphere using dry degassed solvents. Acetonitrile was freshly distilled from molecular sieves, thf was distilled from sodium/benzophenone, and DCM was freshly distilled from P<sub>2</sub>O<sub>5</sub>. [Mo(CO)<sub>2</sub>(cydt)(dppe)] was synthesized following a published literature method<sup>1</sup>.

## 1.2 Synthesis of [Mo(CO)<sub>2</sub>(CH<sub>2</sub>-cydt)(dppe)] (1<sup>CH<sub>2</sub></sup>)

The synthesis of the title compound is performed under strict exclusion of air and moisture. [Mo<sup>II</sup>(CO)<sub>2</sub>(cydt)(dppe)] (51.5 mg, 0.074 mmol, 1 eq.) is weighted into a Schlenk flask together with an equivalent amount of [Co(Cp\*)<sub>2</sub>] (50 mg, 0.152 mmol, 2.05 eq.). The reaction immediately starts upon addition of 2.5 mL dichloromethane showing a color shift to green which then changes to brown. After 24 hours of stirring at room temperature the colored solution is layered with ca. 10 mL of CH<sub>3</sub>CN. After some days orange single crystals suitable for X-ray analysis were obtained. [Mo(CO)<sub>2</sub>(CH<sub>2</sub>-cydt)(dppe)] · 0.5 CH<sub>2</sub>Cl<sub>2</sub>, 31.3 mg, 0.042 mmol, 56 % yield

<sup>1</sup>H-NMR (300 MHz, THF-d<sub>8</sub>, δ [ppm]): 0.95 (m, 1H, 0.5 · CH<sub>2,cydt</sub>), 1.08 (m, 2H, CH<sub>2,cydt</sub>), 1.31 (m, 1H, 0.5 · CH<sub>2,cydt</sub>), 1.62 (m, 1H, 0.5 · CH<sub>2,cydt</sub>), 1.72 (m, 1H, 0.5 · CH<sub>2,cydt</sub>), 1.79 (m, 1H, 0.5 · CH<sub>2,cydt</sub>), 2.20 (m, 2H, 2 · 0.5 · CH<sub>2</sub>, dppe/cydt), 2.36 (m, 1H, 0.5 · CH<sub>2,methylene</sub>), 2.62 (m, 1H, 0.5 · CH<sub>2,dppe</sub>), 2.77 (m, 1H, 0.5 · CH<sub>2,dppe</sub>), 3.01 (m, 1H, 0.5 · CH<sub>2,methylene</sub>), 3.15 (m, 1H, 0.5 · CH<sub>2,dppe</sub>), 7.10-7.23 (m, 3H, CH), 7.28-7.36 (m, 5H, CH), 7.38-7.50 (m, 8H, CH), 7.85-7.95 (m, 4H, CH).

<sup>13</sup>C-NMR (75.5 MHz, THF-d<sub>8</sub>, δ [ppm]): 24.2 (s, CH<sub>2,cydt</sub>), 24.5 (s, CH<sub>2,cydt</sub>), 25.0 (dd), 28.9 (dd, J<sub>1,C-P</sub> = 24.5 Hz, J<sub>2,C-P</sub> = 19.7 Hz, CH<sub>2,dppe</sub>), 33.9 (s, CH<sub>2,cydt</sub>), 36.3 (s, CH<sub>2,cydt</sub>), 39.1 (d, J<sub>C-P</sub> = 5.6 Hz, CH<sub>2,methylene</sub>), 114.1 (s, C<sub>quart.</sub>, CH<sub>2-S-C=C</sub>), 127.5 (d, J<sub>C-P</sub> = 8.0 Hz, CH), 129.0 (d, J<sub>C-P</sub> = 5.6 Hz, CH), 129.1 (d, J<sub>C-P</sub> = 5.6 Hz, CH), 129.2 (d, J<sub>C-P</sub> = 8.8 Hz, CH), 129.5 (d, J<sub>C-P</sub> = ca. 2.1 Hz, CH), 130.4 (d, J<sub>C-P</sub> = ca. 2.1 Hz, CH), 131.1 (dd, J<sub>1,C-P</sub> = 15.7 Hz, J<sub>2,C-P</sub> = 2.0 Hz, CH), 132.2 (d, J<sub>C-P</sub> = 8.8 Hz, CH), 132.9 (d, J<sub>C-P</sub> = 10.4 Hz, CH), 134.5 (d, J<sub>C-P</sub> = 11.2 Hz, CH), 135.1 (m, CH), 135.6 (m, ipso-C), 136.0 (m, ipso-C), 137.6 (s, ipso-C), 138.2 (s, ipso-C), 152.1 (d, J<sub>C-P</sub> = 4.8 Hz, C<sub>CH<sub>2</sub>-S-C=C</sub>), 221.1 (dd, J<sub>1,C-P</sub> = 8.8 Hz, J<sub>2,C-P</sub> = 6.4 Hz, CO), 233.8 (dd, J<sub>1,C-P</sub> = 25.3 Hz, J<sub>2,C-P</sub> = 13.3 Hz, CO).

<sup>31</sup>P-NMR (121.5 MHz, THF-d<sub>8</sub>, δ [ppm]): 46.6 (d, <sup>1</sup>P-P = 28.4 Hz), 63.9 (d, <sup>1</sup>P-P = 28.4 Hz).

<sup>135</sup>DEPT NMR (75.5 MHz, THF-d<sub>8</sub>, δ [ppm]): 24.2 (neg., CH<sub>2,cydt</sub>), 24.5 (neg., CH<sub>2,cydt</sub>), 25.0 (neg., dd, CH<sub>2,dppe</sub>), 28.9 (neg., dd, CH<sub>2,dppe</sub>), 33.9 (neg., CH<sub>2,cydt</sub>), 36.3 (neg., CH<sub>2,cydt</sub>), 39.1 (neg., d, CH<sub>2,methylene</sub>), 127.5 (pos., d, CH), 129.1 (pos., d, CH), 129.2 (pos., d, CH), 129.5 (pos., d, CH), 130.4 (pos., d, CH<sub>H,ar.</sub>), 131.1 (pos., dd, CH), 132.2 (pos., d, CH), 132.9 (pos., d, CH), 134.5 (pos., d, CH), 135.1 (pos., dd, CH).

HSQC NMR (300 & 75.5 MHz, THF-d<sub>8</sub>, δ [ppm]): 0.95 (<sup>1</sup>H, 0.5 · CH<sub>2</sub>) and 24.5 (<sup>13</sup>C, CH<sub>2,cydt</sub>), 1.08 (<sup>1</sup>H, CH<sub>2</sub>) and 24.2 (<sup>13</sup>C, CH<sub>2,cydt</sub>), 1.31 (<sup>1</sup>H, 0.5 · CH<sub>2</sub>) & 24.5 (<sup>13</sup>C, CH<sub>2,cydt</sub>), 1.62 (<sup>1</sup>H, 0.5 · CH<sub>2</sub>) & 36.3 (<sup>13</sup>C, CH<sub>2,cydt</sub>), 1.72 (<sup>1</sup>H, 0.5 · CH<sub>2</sub>) & 36.3 (<sup>13</sup>C, CH<sub>2,cydt</sub>), 1.79 (<sup>1</sup>H, 0.5 · CH<sub>2</sub>) & 33.9 (<sup>13</sup>C, CH<sub>2,cydt</sub>), 2.20 (<sup>1</sup>H, 0.5 · CH<sub>2</sub>) & 28.9 (<sup>13</sup>C, CH<sub>2,dppe</sub>), 2.20 (<sup>1</sup>H, 0.5 · CH<sub>2</sub>) & 33.9 (<sup>13</sup>C, CH<sub>2,cydt</sub>), 2.36 (<sup>1</sup>H, 0.5 · CH<sub>2</sub>) & 39.1 (<sup>13</sup>C, CH<sub>2,methylene</sub>), 2.62 (<sup>1</sup>H, 0.5 · CH<sub>2</sub>) & 25.0 (<sup>13</sup>C, CH<sub>2,dppe</sub>), 2.77 (<sup>1</sup>H, 0.5 · CH<sub>2</sub>) & 25.0 (<sup>13</sup>C, CH<sub>2,dppe</sub>), 3.01 (<sup>1</sup>H, 0.5 · CH<sub>2</sub>) & 39.1 (<sup>13</sup>C, CH<sub>2,methylene</sub>), 3.15 (<sup>1</sup>H, 0.5 · CH<sub>2</sub>) & 28.9 (<sup>13</sup>C, CH<sub>2,dppe</sub>), 7.10-7.23 (<sup>1</sup>H, CH) & 127.5 (<sup>13</sup>C, CH), 7.10-7.23 (<sup>1</sup>H, CH) & 129.3 (<sup>13</sup>C, CH), 7.28-7.36 (<sup>1</sup>H, CH) & 129.0 (<sup>13</sup>C, CH), 7.28-7.36 (<sup>1</sup>H, CH) & 130.4 (<sup>13</sup>C, CH), 7.28-7.36 (<sup>1</sup>H, CH) & 132.2 (<sup>13</sup>C, CH), 7.38-7.50 (<sup>1</sup>H, CH) & 129.2 (<sup>13</sup>C, CH), 7.38-7.50 (<sup>1</sup>H, CH) & 131.1 (<sup>13</sup>C, CH), 7.38-7.50 (<sup>1</sup>H, CH) & 132.9 (<sup>13</sup>C, CH), 7.85-7.95 (<sup>1</sup>H, CH) & 134.5 (<sup>13</sup>C, CH), 7.85-7.95 (<sup>1</sup>H, CH) & 135.1 (<sup>13</sup>C, CH).

IR (KBr):  $\tilde{\nu}$  = 700 cm<sup>-1</sup>, 1094 cm<sup>-1</sup>, 1431 cm<sup>-1</sup>, 1815 cm<sup>-1</sup>, 1929 cm<sup>-1</sup>.

Elemental analysis calcd. for C<sub>35</sub>H<sub>34</sub>MoO<sub>2</sub>P<sub>2</sub>S<sub>2</sub> · 0.5 CH<sub>2</sub>Cl<sub>2</sub>: C: 56.80, H: 4.63, S: 8.54. Found: C: 56.88, H: 4.69, S: 8.43.

## 1.3 Synthesis of 6,7-Dihydro-4H-1,3-dithiol-4,5-thiopyran-2-one (tpydt)

The synthesis of the tpydt precursor ligand follows essentially published routes for 1,3-Dithiol-2-ones.<sup>1-3</sup> Tetrahydro-4H-thiopyran-4-one (5.62 g, 48.4 mmol, 1 eq.) was brominated in  $\alpha$ -position utilising elemental bromine (7.68 g, 48.4 mmol, 1 eq.) under basic conditions (Na<sub>2</sub>CO<sub>3</sub>, 8 g, 57.9 mmol, 1.18 eq.) in DCM. The following workup should be done quickly, as the brominated product appears to be unstable. The interme-

diate product was isolated after typical workup with water and brine and used without further purification. The entire product was then reacted with potassium isopropyl xanthate (9.26 g; 53.24 mmol, 1.1 equiv.) in a 50:50 mixture of acetone and ethanol overnight yielding O-iso-propyl-S-(2-tetrahydro-4H-thiopyranonyl) dithiocarbonate in ca. 98 % yield. The following ring closing step to yield the final product worked best with sulfuric acid added to a solution of the xanthate in ether/dichloromethane overnight. The entire product mixture was then poured onto crushed ice (ca. 400 mL) and extracted with diethylether. Sublimation of the entire product at  $3.2 \cdot 10^{-2}$  mbar and 140 °C yielded colorless crystals suitable for X-ray analysis. Final Yield: 18.5% (1.7 g, 8.93 mmol).

$^1\text{H-NMR}$  (300 MHz,  $\text{CHCl}_3\text{-d}_1$ ,  $\delta$  [ppm]): 2.71-2.79 (m, 2H,  $\text{CH}_2$ ), 2.97 (t,  $J_1 = 5.5$  Hz, 2H,  $\text{CH}_2$ ), 3.46 (t,  $J_1 = 1.9$  Hz, 2H,  $\text{CH}_2$ ).

$^{13}\text{C NMR}$  (75.5 MHz,  $\text{CHCl}_3\text{-d}_1$ ,  $\delta$  [ppm]): 25.2 (s,  $\text{CH}_2$ ), 25.6 (s,  $\text{CH}_2$ ), 26.8 (s,  $\text{CH}_2$ ), 121.8 (s,  $\text{C}_{\text{quart.}}\text{-S}$ ), 126.4 (s,  $\text{C}_{\text{quart.}}\text{-S}$ ), 189.7 (s,  $\text{C}_{\text{quart.}}\text{=O}$ ).

EI-MS [M]: 190.6 m/z.

Elemental analysis calcd. for  $\text{C}_6\text{H}_6\text{OS}_3$ : C: 37.87, H: 3.18, S: 50.54. Found: C: 37.46, H: 3.49, S: 51.64.

## 1.4 Synthesis of $[\text{Mo}(\text{CO})_2(\text{tpydt})(\text{dppe})]$ (2)

The synthesis and purification of this complex followed the literature procedure<sup>1</sup>.  $[\text{Mo}(\text{CO})_4(\text{dppe})]$  (700 mg, 1.15 mmol, 1 eq.) and **tpydt** (250 mg, 1.31 mmol, 1.1 eq.) were irradiated in a THF solution yielding 252 mg (30.6 %, 0.35 mmol) **2**.

$^1\text{H-NMR}$  (300 MHz, THF- $\text{d}_8$ ,  $\delta$  [ppm]): 2.52 (m, 4H,  $2 \cdot \text{CH}_2, \text{dppe}$ ), 2.74 (t,  $J_1 = 6.05$  Hz, 2H,  $\text{CH}_2, \text{tpydt}$ ), 3.16 (t,  $J_1 = 5.96$  Hz, 2H,  $\text{CH}_2, \text{tpydt}$ ), 3.91 (s, 2H,  $\text{CH}_2, \text{tpydt}$ ), 6.99 (m, 4H, 4  $\text{CH}_{\text{ar}}$ ), 7.26 (m, 6H,  $\text{CH}_{\text{ar}}$ ), 7.40 (m, 6H,  $\text{CH}_{\text{ar}}$ ), 7.50 (m, 4H,  $\text{CH}_{\text{ar}}$ ).

$^{31}\text{P-NMR}$  (121.5 MHz, THF- $\text{d}_8$ ,  $\delta$  [ppm]): 82.59 (s).

$^{13}\text{C-NMR}$  (75.5 MHz, THF- $\text{d}_8$ ,  $\delta$  [ppm]): 27.5 (s,  $\text{CH}_2, \text{tpydt}$ ), 28.5 (t,  $J_{\text{P-C}} = 21.3$  Hz,  $\text{CH}_2, \text{dppe}$ ), 35.6 (s,  $\text{CH}_2, \text{tpydt}$ ), 38.9 (s,  $\text{CH}_2, \text{tpydt}$ ), 128.9 (dt,  $2 \cdot 2 \text{CH}$ ,  $J_{1,\text{P-C}} = 32.3$  Hz,  $J_{2,\text{P-C}} = 5.1$  Hz), 130.7 (d,  $2 \cdot 2 \text{CH}$ ,  $J_{\text{P-C}} = 31.6$  Hz), 133.7 (dt,  $2 \cdot 2 \text{CH}$ ,  $J_{1,\text{P-C}} = 16.9$  Hz,  $J_{2,\text{P-C}} = 5.1$  Hz), 136.2 (m,  $\text{C}_{\text{quart.}}$ ), 138.0 (m,  $\text{C}_{\text{quart.}}$ ), 148.5 (m,  $\text{C}_{\text{quart.}}, \text{C-S}$ ), 153.0 (m,  $\text{C}_{\text{quart.}}, \text{C-S}$ ), 242.9 (t,  $\text{C}_{\text{CO}}$ ,  $^2J_{\text{P-C}} = 30.1$  Hz).

$^{135}\text{DEPT NMR}$  (75.5 MHz, THF- $\text{d}_8$ ,  $\delta$  [ppm]): 27.5 (neg.,  $\text{CH}_2$ ), 28.5 (neg.,  $\text{CH}_2$ ), 35.6 (neg.,  $\text{CH}_2$ ), 38.9 (neg.,  $\text{CH}_2$ ), 128.9 (pos., CH), 130.7 (pos., CH), 133.7 (pos., CH), 136.2 (pos., CH).

HH-COSY NMR (300 MHz, THF- $\text{d}_8$ ,  $\delta$  [ppm]): 2.74 ( $2 \text{ CH}_2, \text{tpydt}$  & 3.16  $\text{CH}_2, \text{tpydt}$ ), 3.16 ( $2 \text{ CH}_2, \text{tpydt}$  & 3.91  $\text{CH}_2, \text{tpydt}$ ), 6.99-7.50 ( $\text{CH}_{\text{ar}}$ ) & 6.99-7.50 ( $\text{CH}_{\text{ar}}$ ).

HSQC NMR (300 und 75.5 MHz, THF- $\text{d}_8$ ,  $\delta$  [ppm]): 2.54 ( $^1\text{H}$ ,  $2 \cdot \text{CH}_2, \text{dppe}$ ) & 28.5 ( $^1\text{H}$ ,  $2 \cdot \text{CH}_2, \text{dppe}$ ), 2.70 ( $^1\text{H}$ ,  $\text{CH}_2, \text{tpydt}$ ) & 27.5 ( $^{13}\text{C}$ ,  $\text{CH}_2$ ), 3.08 ( $^1\text{H}$ ,  $\text{CH}_2, \text{tpydt}$ ) & 38.9 ( $^{13}\text{C}$ ,  $\text{CH}_2$ ), 3.86 ( $^1\text{H}$ ,  $\text{CH}_2, \text{tpydt}$ ) & 35.9 ( $^{13}\text{C}$ ,  $\text{CH}_2$ ), 6.99 ( $^1\text{H}$ ,  $\text{CH}_{\text{ar}}$ ) & 133.6 ( $^{13}\text{C}$ ,  $\text{CH}_{\text{ar}}$ ), 7.26 ( $^1\text{H}$ ,  $\text{CH}_{\text{ar}}$ ) & 128.9 ( $^{13}\text{C}$ ,  $\text{CH}_{\text{ar}}$ ), 7.26 ( $^1\text{H}$ ,  $\text{CH}_{\text{ar}}$ ) und 130.7 ( $^{13}\text{C}$ ,  $\text{CH}_{\text{ar}}$ ), 7.40 ( $^1\text{H}$ ,  $\text{CH}_{\text{ar}}$ ) & 128.9 ( $^{13}\text{C}$ ,  $\text{CH}_{\text{ar}}$ ), 7.40 ( $^1\text{H}$ ,  $\text{CH}_{\text{ar}}$ ) & 130.7 ( $^{13}\text{C}$ ,  $\text{CH}_{\text{ar}}$ ), 7.50 ( $^1\text{H}$ ,  $\text{CH}_{\text{ar}}$ ) & 133.7 ( $^{13}\text{C}$ ,  $\text{CH}_{\text{ar}}$ ).

HMBC NMR (300 and 75.5 MHz, THF- $\text{d}_8$ ,  $\delta$  [ppm]): 2.74 ( $^1\text{H}$ ,  $\text{CH}_2, \text{tpydt}$ ) & 35.6 ( $^{13}\text{C}$ ,  $\text{CH}_2$ ), 2.74 ( $^1\text{H}$ ,  $\text{CH}_2, \text{tpydt}$ ) & 153.0 ( $^{13}\text{C}$ ,  $\text{CH}_2$ ), 3.16 ( $^1\text{H}$ ,  $\text{CH}_2, \text{tpydt}$ ) & 27.5 ( $^{13}\text{C}$ ,  $\text{CH}_2$ ), 3.16 ( $^1\text{H}$ ,  $\text{CH}_2, \text{tpydt}$ ) & 148.5 ( $^{13}\text{C}$ , C-S), 3.16 ( $^1\text{H}$ ,  $\text{CH}_2, \text{tpydt}$ ) & 153.0 ( $^{13}\text{C}$ , C-S), 3.91 ( $^1\text{H}$ ,  $\text{CH}_2, \text{tpydt}$ ) & 27.5 ( $^{13}\text{C}$ ,  $\text{CH}_2$ ), 3.91 ( $^1\text{H}$ ,  $\text{CH}_2, \text{tpydt}$ ) & 148.5 ( $^{13}\text{C}$ , C-S), 3.91 ( $^1\text{H}$ ,  $\text{CH}_2, \text{tpydt}$ ) & 153.0 ( $^{13}\text{C}$ , C-S), 6.99-7.50 ( $^1\text{H}$ ,  $\text{CH}_{\text{ar}}$ ) & 128.9-138.0 ( $^{13}\text{C}$ ,  $\text{CH}_{\text{ar}}$ ).

IR (KBr):  $\tilde{\nu} = 1434 \text{ cm}^{-1}$ ,  $1877 \text{ cm}^{-1}$ ,  $1957 \text{ cm}^{-1}$ .

TLC Rf-value: 0.47 (*n*-hexan/DCM: 2/3).

Elemental analysis calcd. for  $\text{C}_{33}\text{H}_{30}\text{O}_2\text{P}_2\text{S}_3\text{Mo}$ : C: 55.62, H: 4.24, S: 13.50. Found: C: 55.32, H: 4.36, S: 13.48.

## 1.5 Synthesis of $[\text{Mo}(\text{CO})_2(\text{CH}_2\text{-tpydt})(\text{dppe})]$ ( $2^{\text{CH}_2}$ )

The synthesis of the title compound is performed under strict exclusion of air and moisture.  $[\text{Mo}(\text{CO})_2(\text{tpydt})(\text{dppe})]$  (24.2 mg, 0.033 mmol, 1 eq.) is weighted in a Schlenk flask together with an equivalent amount of  $[\text{Co}(\text{Cp}^*)_2]$  (24.2 mg, 0.07 mmol, 2.2 eq.). The reaction immediately starts upon addition of 2.5 mL dichloromethane showing a color shift to green which then changes to brown. After 24 hours of stirring at room temperature the colored solution is layered with ca. 10 mL of  $\text{CH}_3\text{CN}$ . After some days orange

single crystals suitable for X-ray analysis were obtained.  $[\text{Mo}(\text{CO})_2(\text{CH}_2\text{-tpydt})(\text{dppe})] \cdot 0.5 \text{CH}_2\text{Cl}_2$ , 16.0 mg, 0.021 mmol, 63 % yield.

$^1\text{H-NMR}$  (300 MHz, THF-d<sub>8</sub>,  $\delta$  [ppm]):<sup>1</sup> 1.83-2.12 (br m, 3H,  $\text{CH}_2$ ,tpydt), 2.12-2.55 (br m, 4H,  $\text{CH}_2$ ,tpydt and  $\text{CH}_2$ ,dppe), 2.59-2.87 (br m, 3H,  $\text{CH}_2$ ,tpydt), 3.02 (m, 1H, 0.5 ·  $\text{CH}_2$ ,methylene, major and minor), 3.09-3.26 (br m, 1H,  $\text{CH}_2$ ,tpydt and  $\text{CH}_2$ ,dppe), 7.10-7.25 (m, 4H,  $\text{CH}_{\text{ar}}$ ), 7.28-7.36 (m, 4H,  $\text{CH}_{\text{ar}}$ ), 7.36-7.51 (m, 8H,  $\text{CH}_{\text{ar}}$ ), 7.81-7.94 (m, 4H,  $\text{CH}_{\text{ar}}$ ).

$^{13}\text{C NMR}$  (75.5 MHz, THF-d<sub>8</sub>,  $\delta$  [ppm]): 24.7 (dd<sup>2</sup>,  $\text{CH}_2$ , tpydt), 26.5 (s, minor,  $\text{CH}_2$ ,tpydt), 27.2 (s, major,  $\text{CH}_2$ ,tpydt), 29.0 (pddd<sup>3</sup>,  $J_{1,\text{C-P}} = 19.7 \text{ Hz}$ ,  $J_{2,\text{C-P}} = 6.2 \text{ Hz}$ ,  $\text{CH}_2$ ,dppe), 32.8 (s,  $\text{CH}_2$ ,tpydt), 34.9 (s,  $\text{CH}_2$ ,tpydt), 36.2 (s,  $\text{CH}_2$ ,tpydt), 37.7 (d, minor,  $J_{\text{C-P}} = 6.2 \text{ Hz}$ ,  $\text{CH}_2$ ,methylene), 38.6 (d, major,  $J_{\text{C-P}} = 6.2 \text{ Hz}$ ,  $\text{CH}_2$ ,methylene), 38.8 (s,  $\text{CH}_2$ ,tpydt), 110.5 (s, minor,  $\text{C}_{\text{quart.}}$ , C-S- $\text{CH}_2$ ), 115.2 (s, major,  $\text{C}_{\text{quart.}}$ , C-S- $\text{CH}_2$ ), 127.5 (d, minor,  $J_{\text{C-P}} = 8.6 \text{ Hz}$ ,  $\text{CH}_{\text{ar}}$ ), 127.6 (d, major,  $J_{\text{C-P}} = 8.6 \text{ Hz}$ ,  $\text{CH}_{\text{ar}}$ ), 128.9 (m, minor,  $\text{CH}_{\text{ar}}$ ), 129.2 (m, major,  $\text{CH}_{\text{ar}}$ ), 129.6 (d,  $J_{\text{C-P}} = 2.3 \text{ Hz}$ ,  $\text{CH}_{\text{ar}}$ ), 129.8 (d,  $J_{\text{C-P}} = 2.3 \text{ Hz}$ ,  $\text{CH}_{\text{ar}}$ ), 130.4 (m, minor,  $\text{CH}_{\text{ar}}$ ), 131.0 (m, major,  $\text{CH}_{\text{ar}}$ ), 131.2 (dd,  $J_{1,\text{C-P}} = 3.9 \text{ Hz}$ ,  $J_{2,\text{C-P}} = 2.3 \text{ Hz}$ ,  $\text{CH}_{\text{H,ar}}$ ), 132.0 (d,  $J_{\text{C-P}} = 2.4 \text{ Hz}$ ,  $\text{CH}_{\text{ar}}$ ), 132.1 (d,  $J_{\text{C-P}} = 3.1 \text{ Hz}$ ,  $\text{CH}_{\text{ar}}$ ), 132.7 (d,  $J_{\text{C-P}} = 2.4 \text{ Hz}$ ,  $\text{CH}_{\text{ar}}$ ), 132.8 (d,  $J_{\text{C-P}} = 3.1 \text{ Hz}$ ,  $\text{CH}_{\text{ar}}$ ), 134.2 (d, minor,  $J_{\text{C-P}} = 5.5 \text{ Hz}$ ,  $\text{CH}_{\text{ar}}$ ), 134.3 (d,  $J_{\text{C-P}} = 5.5 \text{ Hz}$ ,  $\text{CH}_{\text{ar}}$ ), 134.5 (s,  $\text{C}_{\text{quart.}}$ ), 134.6 (s,  $\text{C}_{\text{quart.}}$ ), 134.8 (d, minor,  $J_{\text{C-P}} = 3.9 \text{ Hz}$ ,  $\text{CH}_{\text{ar}}$ ), 135.0 (d, major,  $J_{\text{C-P}} = 3.9 \text{ Hz}$ ,  $\text{CH}_{\text{ar}}$ ), 135.1 (m,  $\text{C}_{\text{quart.}}$ ), 135.3 (s,  $\text{C}_{\text{quart.}}$ ), 135.5 (m,  $\text{C}_{\text{quart.,ar}}$ ), 135.7 (m,  $\text{C}_{\text{quart.,ar}}$ ), 137.3 (s,  $\text{C}_{\text{quart.,ar}}$ ), 137.9 (s,  $\text{C}_{\text{quart.,ar}}$ ), 148.7 (d, minor,  $^2J_{\text{C-P}} = 4.8 \text{ Hz}$ ,  $\text{C}_{\text{quart.}}$ , C-S), 153.6 (d, major,  $^2J_{\text{C-P}} = 4.7 \text{ Hz}$ ,  $\text{C}_{\text{quart.}}$ , C-S), 220.9 (m, minor, CO), 233.1 (m, major, CO).

$^{31}\text{P NMR}$  (121.5 MHz, THF-d<sub>8</sub>,  $\delta$  [ppm]): 46.7 (d, minor,  $^1P\text{-P} = 28.4 \text{ Hz}$ ), 47.0 (d, major,  $^1P\text{-P} = 28.4 \text{ Hz}$ ), 63.7 (m, minor and major).

$^{135}\text{DEPT NMR}$  (75.5 MHz, THF-d<sub>8</sub>,  $\delta$  [ppm]): 24.7 (neg., dd,  $\text{CH}_2$ ,tpydt); 26.5 (neg., s, minor,  $\text{CH}_2$ ,tpydt), 27.2 (neg., s, major,  $\text{CH}_2$ ,tpydt), 29.0 (neg., m,  $\text{CH}_2$ ,dppe), 32.8 (neg., s,  $\text{CH}_2$ ,tpydt), 34.9 (neg., s,  $\text{CH}_2$ ,tpydt), 36.2 (neg., s,  $\text{CH}_2$ ,tpydt), 37.7 (neg., d, minor,  $\text{CH}_2$ ,Methylene), 38.6 (neg., d, major,  $\text{CH}_2$ ,methylene), 38.8 (neg., s,  $\text{CH}_2$ ,tpydt), 127.5 (pos., d, minor,  $\text{CH}_{\text{ar}}$ ), 127.6 (pos., d, major,  $\text{CH}_{\text{ar}}$ ), 128.9 (pos., m, minor,  $\text{CH}_{\text{ar}}$ ), 129.2 (pos., m, major,  $\text{CH}_{\text{ar}}$ ), 129.6 (pos., d,  $\text{CH}_{\text{ar}}$ ), 129.8 (pos., d,  $\text{CH}_{\text{ar}}$ ), 130.4 (pos., m,  $\text{CH}_{\text{ar}}$ ), 131.0 (pos., m,  $\text{CH}_{\text{ar}}$ ), 131.2 (pos., dd,  $\text{CH}_{\text{ar}}$ ), 132.0 (pos., d,  $\text{CH}_{\text{ar}}$ ), 132.1 (pos., d,  $\text{CH}_{\text{ar}}$ ), 132.7 (pos., d,  $\text{CH}_{\text{ar}}$ ), 132.8 (pos., d,  $\text{CH}_{\text{ar}}$ ), 134.2 (pos., d, minor,  $\text{CH}_{\text{ar}}$ ), 134.3 (pos., d, major,  $\text{CH}_{\text{ar}}$ ), 134.8 (pos., d, minor,  $\text{CH}_{\text{ar}}$ ), 135.0 (pos., d, major,  $\text{CH}_{\text{ar}}$ ).

HSQC NMR (300 und 75.5 MHz, THF-d<sub>8</sub>,  $\delta$  [ppm]): 1.90 ( $^1\text{H}$ ,  $\text{CH}_2$ ) and 27.2 ( $^{13}\text{C}$ ,  $\text{CH}_2$ ,tpydt), 2.02 ( $^1\text{H}$ ,  $\text{CH}_2$ ) and 26.5 ( $^{13}\text{C}$ ,  $\text{CH}_2$ ,tpydt), 2.04 ( $^1\text{H}$ ,  $\text{CH}_2$ ) and 38.8 ( $^{13}\text{C}$ ,  $\text{CH}_2$ ,tpydt), 2.06 ( $^1\text{H}$ ,  $\text{CH}_2$ ) and 36.2 ( $^{13}\text{C}$ ,  $\text{CH}_2$ ,tpydt), 2.18 ( $^1\text{H}$ ,  $\text{CH}_2$ ) and 26.5 ( $^{13}\text{C}$ ,  $\text{CH}_2$ ,tpydt), 2.27 ( $^1\text{H}$ ,  $\text{CH}_2$ ) and 29.0 ( $^{13}\text{C}$ ,  $\text{CH}_2$ ,dppe), 2.35 ( $^1\text{H}$ ,  $\text{CH}_2$ ) and 27.2 ( $^{13}\text{C}$ ,  $\text{CH}_2$ ,tpydt), 2.35 ( $^1\text{H}$ ,  $\text{CH}_2$ ) and 37.7 ( $^{13}\text{C}$ ,  $\text{CH}_2$ ,methylene), 2.39 ( $^1\text{H}$ ,  $\text{CH}_2$ ) and 38.8 ( $^{13}\text{C}$ ,  $\text{CH}_2$ ,methylene), 2.47 ( $^1\text{H}$ ,  $\text{CH}_2$ ) and 36.2 ( $^{13}\text{C}$ ,  $\text{CH}_2$ ,tpydt), 2.61 ( $^1\text{H}$ ,  $\text{CH}_2$ ) and 34.9 ( $^{13}\text{C}$ ,  $\text{CH}_2$ ,tpydt), 2.65 ( $^1\text{H}$ ,  $\text{CH}_2$ ) and 24.7 ( $^{13}\text{C}$ ,  $\text{CH}_2$ ,tpydt), 2.66 ( $^1\text{H}$ ,  $\text{CH}_2$ ) and 34.9 ( $^{13}\text{C}$ ,  $\text{CH}_2$ ,tpydt), 2.73 ( $^1\text{H}$ ,  $\text{CH}_2$ ) and 34.9 ( $^{13}\text{C}$ ,  $\text{CH}_2$ ,tpydt), 2.77 ( $^1\text{H}$ ,  $\text{CH}_2$ ) and 24.7 ( $^{13}\text{C}$ ,  $\text{CH}_2$ ,tpydt), 2.79 ( $^1\text{H}$ ,  $\text{CH}_2$ ) and 34.9 ( $^{13}\text{C}$ ,  $\text{CH}_2$ ,tpydt), 2.81 ( $^1\text{H}$ ,  $\text{CH}_2$ ) and 32.8 ( $^{13}\text{C}$ ,  $\text{CH}_2$ ,tpydt), 2.86 ( $^1\text{H}$ ,  $\text{CH}_2$ ) and 32.8 ( $^{13}\text{C}$ ,  $\text{CH}_2$ ,tpydt), 3.02 ( $^1\text{H}$ ,  $\text{CH}_2$ ) and 37.7 ( $^{13}\text{C}$ ,  $\text{CH}_2$ ,methylene), 3.04 ( $^1\text{H}$ ,  $\text{CH}_2$ ) and 38.8 ( $^{13}\text{C}$ ,  $\text{CH}_2$ ,methylene), 3.08 ( $^1\text{H}$ ,  $\text{CH}_2$ ) and 29.0 ( $^{13}\text{C}$ ,  $\text{CH}_2$ ,dppe), 3.22 ( $^1\text{H}$ ,  $\text{CH}_2$ ) and 29.0 ( $^{13}\text{C}$ ,  $\text{CH}_2$ ,dppe), 3.24 ( $^1\text{H}$ ,  $\text{CH}_2$ ) and 32.8 ( $^{13}\text{C}$ ,  $\text{CH}_2$ ,tpydt), 3.30 ( $^1\text{H}$ ,  $\text{CH}_2$ ) and 32.8 ( $^{13}\text{C}$ ,  $\text{CH}_2$ ,tpydt), 7.18 ( $^1\text{H}$ , CH) and 127.5 ( $^{13}\text{C}$ ,  $\text{CH}_{\text{ar}}$ ), 7.18 ( $^1\text{H}$ , CH) and 132.0 ( $^{13}\text{C}$ ,  $\text{CH}_{\text{ar}}$ ), 7.21 ( $^1\text{H}$ , CH) and 129.6 ( $^{13}\text{C}$ ,  $\text{CH}_{\text{ar}}$ ), 7.33 ( $^1\text{H}$ , CH) and 128.9 ( $^{13}\text{C}$ ,  $\text{CH}_{\text{ar}}$ ), 7.33 ( $^1\text{H}$ , CH) and 130.4 ( $^{13}\text{C}$ ,  $\text{CH}_{\text{ar}}$ ), 7.33 ( $^1\text{H}$ , CH) and 132.0 ( $^{13}\text{C}$ ,  $\text{CH}_{\text{ar}}$ ), 7.44 ( $^1\text{H}$ , CH) and 128.9 ( $^{13}\text{C}$ ,  $\text{CH}_{\text{ar}}$ ), 7.45 ( $^1\text{H}$ , CH) and 128.9 ( $^{13}\text{C}$ ,  $\text{CH}_{\text{ar}}$ ), 7.47 ( $^1\text{H}$ , CH) and 131.0 ( $^{13}\text{C}$ ,  $\text{CH}_{\text{ar}}$ ), 7.87 ( $^1\text{H}$ , CH) and 132.7 ( $^{13}\text{C}$ ,  $\text{CH}_{\text{ar}}$ ), 7.90 ( $^1\text{H}$ , CH) and 134.3 ( $^{13}\text{C}$ ,  $\text{CH}_{\text{ar}}$ ), 7.90 ( $^1\text{H}$ , CH) and 134.2 ( $^{13}\text{C}$ ,  $\text{CH}_{\text{ar}}$ ).

Elemental analysis calcd. for  $\text{C}_{34}\text{H}_{32}\text{MoO}_2\text{P}_2\text{S}_3 \cdot 0.5 \cdot \text{CH}_2\text{Cl}_2$  C: 53.87, H: 4.32, S: 12.50. Found: C: 53.26, H: 4.23, S: 12.29.

<sup>1</sup>Due to the asymmetric character of the used dithiolenes (**tpydt**) two diastereomeric complexes exist. This causes several broad signals in the range from 1.83 to 3.26 ppm which cannot directly be integrated. To certainly assign those peaks though, these signals were identified by HSQC experiments which is mentioned if necessary.

<sup>2</sup>hidden by the signal from THF-d<sub>8</sub>, but clearly assigned by  $^{135}\text{DEPT-NMR}$

<sup>3</sup>merged double doublets of both conformers.

## 1.6 $^{31}\text{P}$ -NMR Signals for $1^{\text{CH}_2}$ and $2^{\text{CH}_2}$

Both initial complexes **1** and **2** show a singlet in the  $^{31}\text{P}$ -NMR due to the relative free rotation and trigonal-prismatic structure. The two respective methenylated complexes, in contrast, are octahedral and hindered in their rotation. Thus, both phosphorous atoms are chemically inequivalent now and exhibit different shifts. Each signal is a doublet peak representing the P-P coupling ( $^2J^{\text{PP}} = 28.4$  Hz). An additional interesting feature with  $2^{\text{CH}_2}$  is related to the additional asymmetry due to the exchange of one  $\text{CH}_2$  group with sulfur in the respective dithiolene. The triplet observed in the room temperature NMR actually consists of two doublets merging at this temperature. Similarly, the apparent doublet at around 63 ppm starts to split into two doublets. The respective temperature dependent NMR-study is shown in Figure S1.

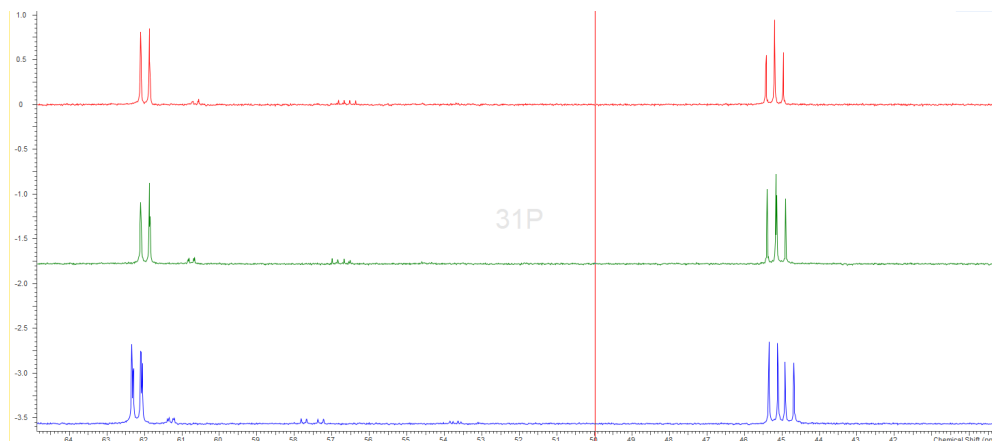

Figure S 1: Temperature dependent  $^{31}\text{P}$ -NMR spectra of  $2^{\text{CH}_2}$ . From top to bottom 338 K, 298 K, 258 K. Especially the spectrum at the lowest measured temperature clearly shows that the former doublet and triplet actually consist of two doublets as explained in the text.

## 1.7 Electrochemistry

The experiments were carried out in a conventional three-electrode cell using a METROHM PGSTAT204 apparatus. Counter electrode and pseudo-reference electrode were platinum rods while a glassy-carbon or platinum disc served (diameter 1.6 mm) as working electrode. Cyclic voltammograms were referenced with Decamethylferrocene ( $\text{DFc}/\text{DFc}^+$ ) and re-calculated to the reference couple  $\text{Fc}/\text{Fc}^+ = 0$  V as internal standard. Tetrabutylammonium hexafluorophosphate (0.1 M) was employed as supporting electrolyte in most cases.

## 1.8 X-ray

Crystals of **tpydt**,  $[\text{Mo}(\text{CO})_2(\text{CH}_2\text{-cydt})(\text{dppe})]$  ( $1^{\text{CH}_2}$ ),  $[\text{Mo}(\text{CO})_2(\text{tpydt})(\text{dppe})]$  (**2**) and  $[\text{Mo}(\text{CO})_2(\text{CH}_2\text{-tpydt})(\text{dppe})]$  ( $2^{\text{CH}_2}$ ) were mounted on a glass fiber in inert paraffin oil. Data were recorded at 170 K on a STOE-IPDS 2 T diffractometer with graphite-monochromated Mo- $\text{K}\alpha$ -radiation ( $\lambda = 0.71073$  Å). The program XArea was used for integration of diffraction profiles; numerical absorption corrections were carried out with the programs X-Shape and X-Red32; all from STOE<sup>©</sup>. The structures were solved by dual space methods (SHELXT-2018) and refined by full-matrix least-squares techniques using the WingX GUI or OLEX<sup>2</sup> and SHELXL-2018.<sup>4-8</sup> All non-hydrogen-atoms were refined with anisotropic displacement parameters. All hydrogen atoms were refined isotropically at calculated positions using a riding model with their  $U_{\text{iso}}$  values constrained to 1.2  $U_{\text{eq}}$  of their pivot atoms. The structure of  $1^{\text{CH}_2}$  was refined as inversion twin with  $\text{BASF} = 0.36516$ . Atoms of the dithiolene ligand in compound  $2^{\text{CH}_2}$  are disordered over three locations with regard to a ring pucker and the relative location of the ring sulfur atom. The disorder was modelled with SADI, SIMU and DELU constraints. Occupancies are 41%, 31%, and 28%.

Atoms of the dithiolene ligand in compound **2** are disordered over two locations with regard to ring pucker and the relative location of the ring sulfur atom. The disorder was modelled using SAME, SIMU and DELU constraints and with occupancies of 93% and 7%. One reflex was omitted as clear outlier. The disorder results in a B-alert (PLAT410\_ALERT\_2\_B Short Intra H...H Contact H4A..H5'1) which points to a H-H

contact that involves hydrogen atoms that cannot be present in the same molecule (i.e. it is either one or the other for a specific individual molecule). Another B-alert (PLAT910\_ALERT\_3\_B Missing # of FCF Reflection(s) Below Theta(Min). 11 Note) goes back to relatively weak diffraction of the crystal and beam-stop affection.

The crystal of **tpydt** was a non-merohedral twin and the reflexes of the different domains were separated during integration with X-Area. This led to some reflexes having not been included in the hkl file (for being assigned to a different domain) and an incomplete data set. This is reflected in a completeness of only ca. 50% and a respective A-alert in the checkcif file (PLAT029\_ALERT\_3\_A\_diffn\_measured\_fraction\_theta\_full value Low.).

In all four structures a low bond precision on C-C bonds was observed (PLAT342\_ALERT\_3\_B/C Low Bond Precision on C-C Bonds). This is, however, rather common for the crystal structures of *non-innocent* dithiolenes species.

Crystallographic data were deposited with the Cambridge Crystallographic Data Centre, CCDC, 12 Union Road, Cambridge CB21EZ, UK. These data can be obtained free of charge upon quoting the depository numbers CCDC 2080179 (**1<sup>CH2</sup>**), 2094531 (**2<sup>CH2</sup>**), 2094530 (**2**), and 2094532 (**tpydt**) by FAX (+44-1223-336-033), email (deposit@ccdc.cam.ac.uk), or their web interface (at <http://www.ccdc.cam.ac.uk>).

## 1.9 Other Physical Methods

IR spectra were recorded as KBr pellets with an FTIR spectrometer Shimadzu IRAffinity-1. Elemental analyses (C, H, and S) were carried out with an Elementar Vario MICRO elemental analyzer.

## 1.10 Quantum chemical calculations

The ORCA program package, version 4.1.2, was used for all density functional theory calculations.<sup>9</sup> Geometry optimisation started with the single crystal structure data. The BP86 density functional under the resolution of the identity approximation was applied.<sup>10-12</sup> Ahlrich's triple- $\zeta$  basis set def2-TZVP with the effective core potentials for molybdenum was used, except for the carbon and hydrogen atoms where def2-SVP was employed.<sup>13,14</sup> def2/J was chosen as the auxiliary basis set.<sup>15</sup> Dispersion corrections were included according to Grimme's D3zero scheme.<sup>16</sup> Environmental effects were considered with the CPCM model using THF as the solvent.<sup>17</sup> Tight SCF and optimisation convergence criteria as well as a grid size of 7 were chosen in the ORCA nomenclature. The integration accuracy was set to 7.0.

To confirm the geometries obtained as true minima on the potential energy surface, frequency calculations were run with the same setup as for the geometry optimisations except for the omission of the solvent model. From these calculations, the computed IR spectra and the thermodynamic data were extracted.

## 2 Additional Figures

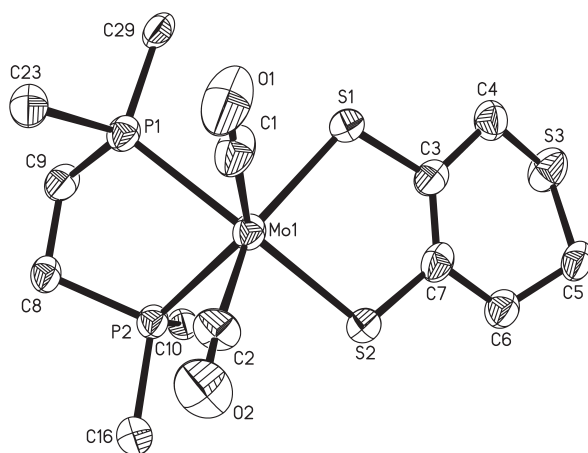

Figure S 2: Molecular structure of  $[\text{Mo}(\text{CO})_2(\text{tpydt})(\text{dppe})]$  (**2**,  $R = 5.59\%$ ,  $R_{\text{int}} = 9.61\%$ ), ellipsoids are shown at the 50% probability level. Phenyl rings, hydrogen atoms and co-crystallized solvent molecules are not shown for clarity reasons.

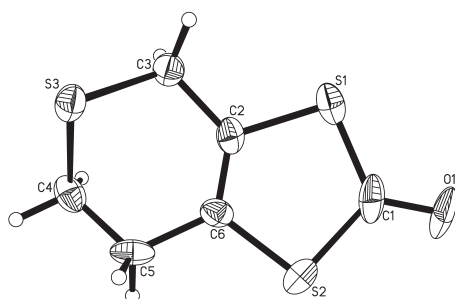

Figure S 3: Molecular structure of 6,7-Dihydro-4H-1,3-dithiol[4,5]thiopyran-2-one (**tpydt**,  $R = 5.23\%$ ,  $R_{\text{int}} = 10.13\%$ ), ellipsoids are shown at the 50% probability level.

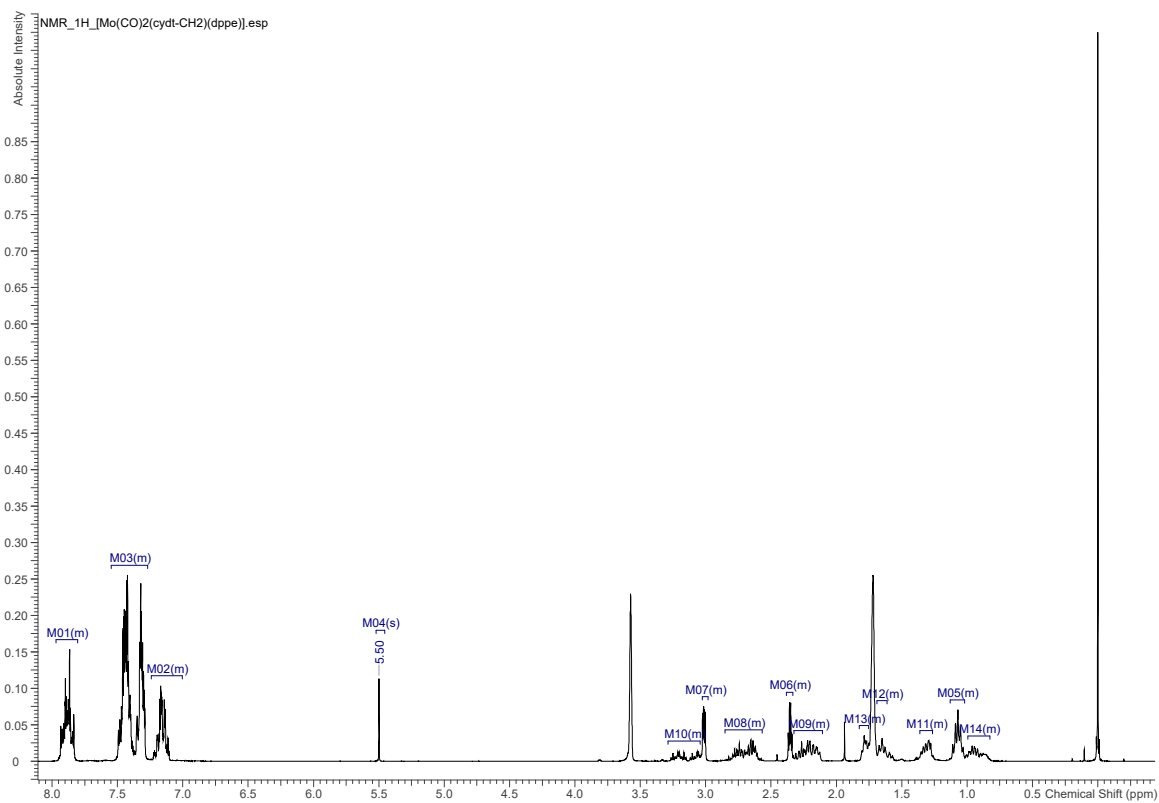

Figure S 4:  $^1\text{H}$ -NMR of  $1\text{CH}_2$  in THF-d8.

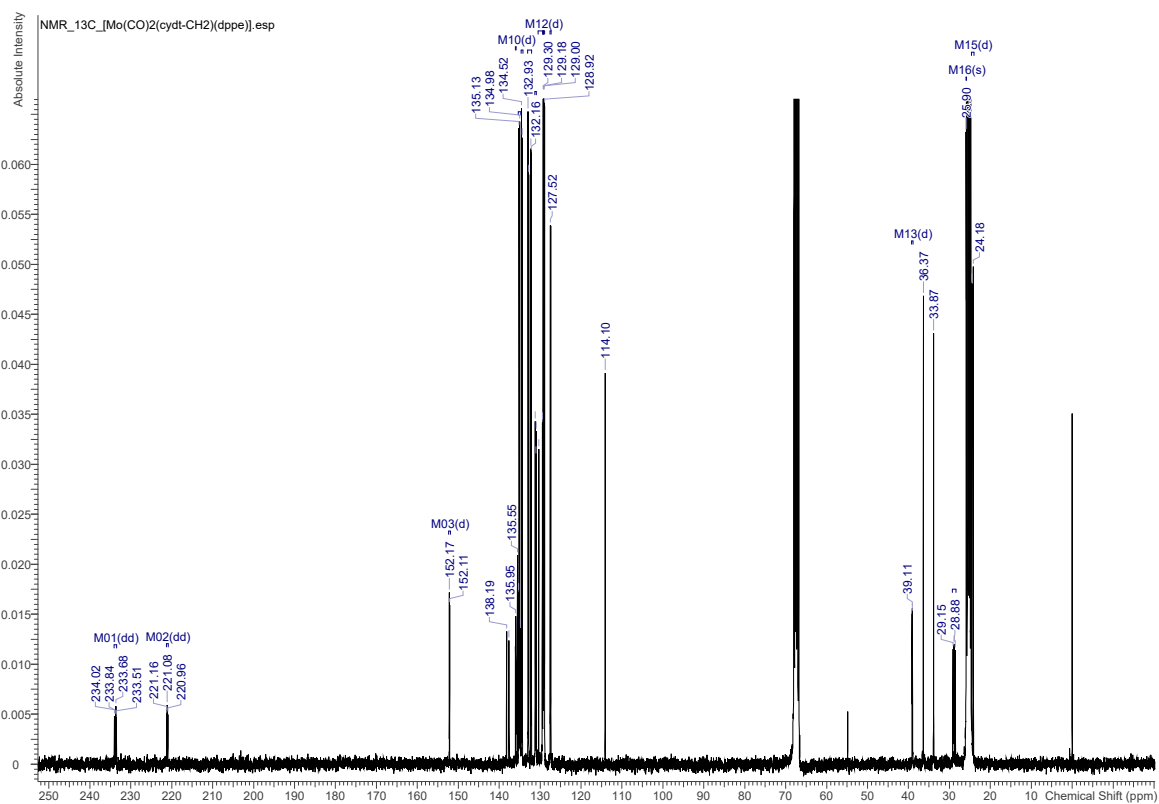

Figure S 5:  $^{13}\text{C}$ -NMR of  $1\text{CH}_2$  in THF-d8.



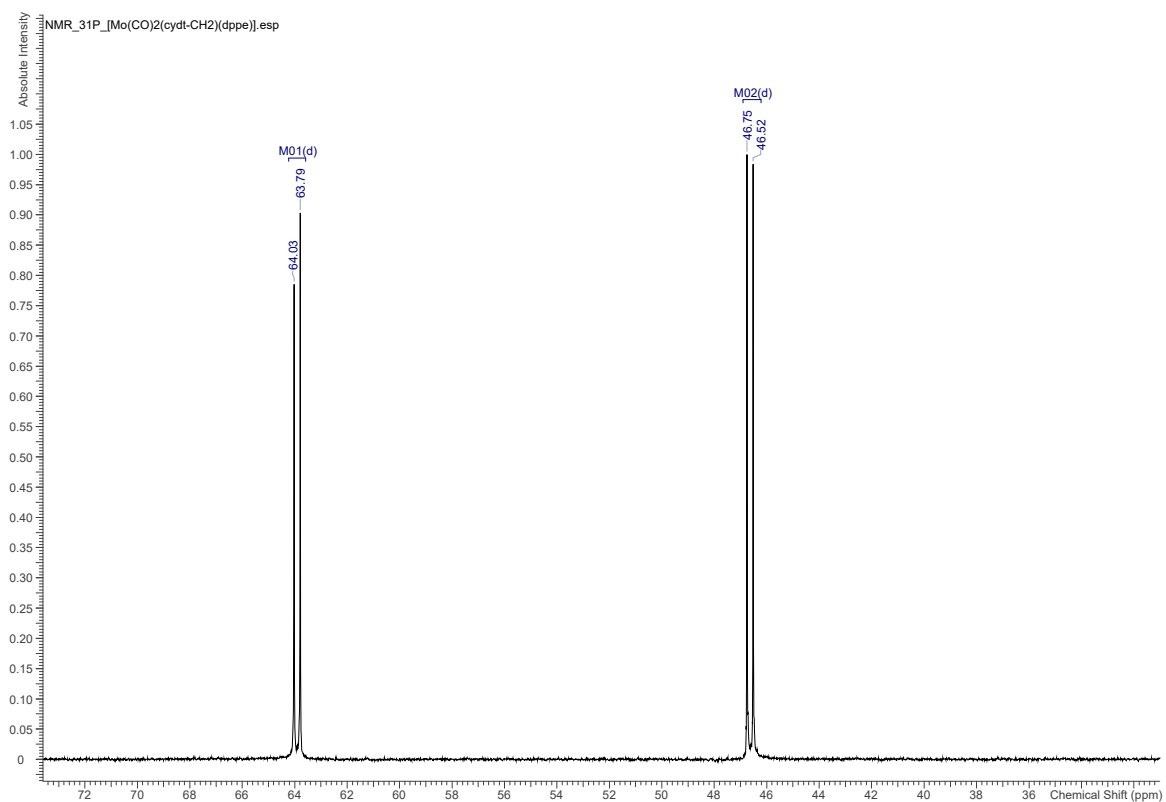

Figure S 6:  $^{31}\text{P}$ -NMR of  $1^{\text{CH}_2}$  in THF-d8.

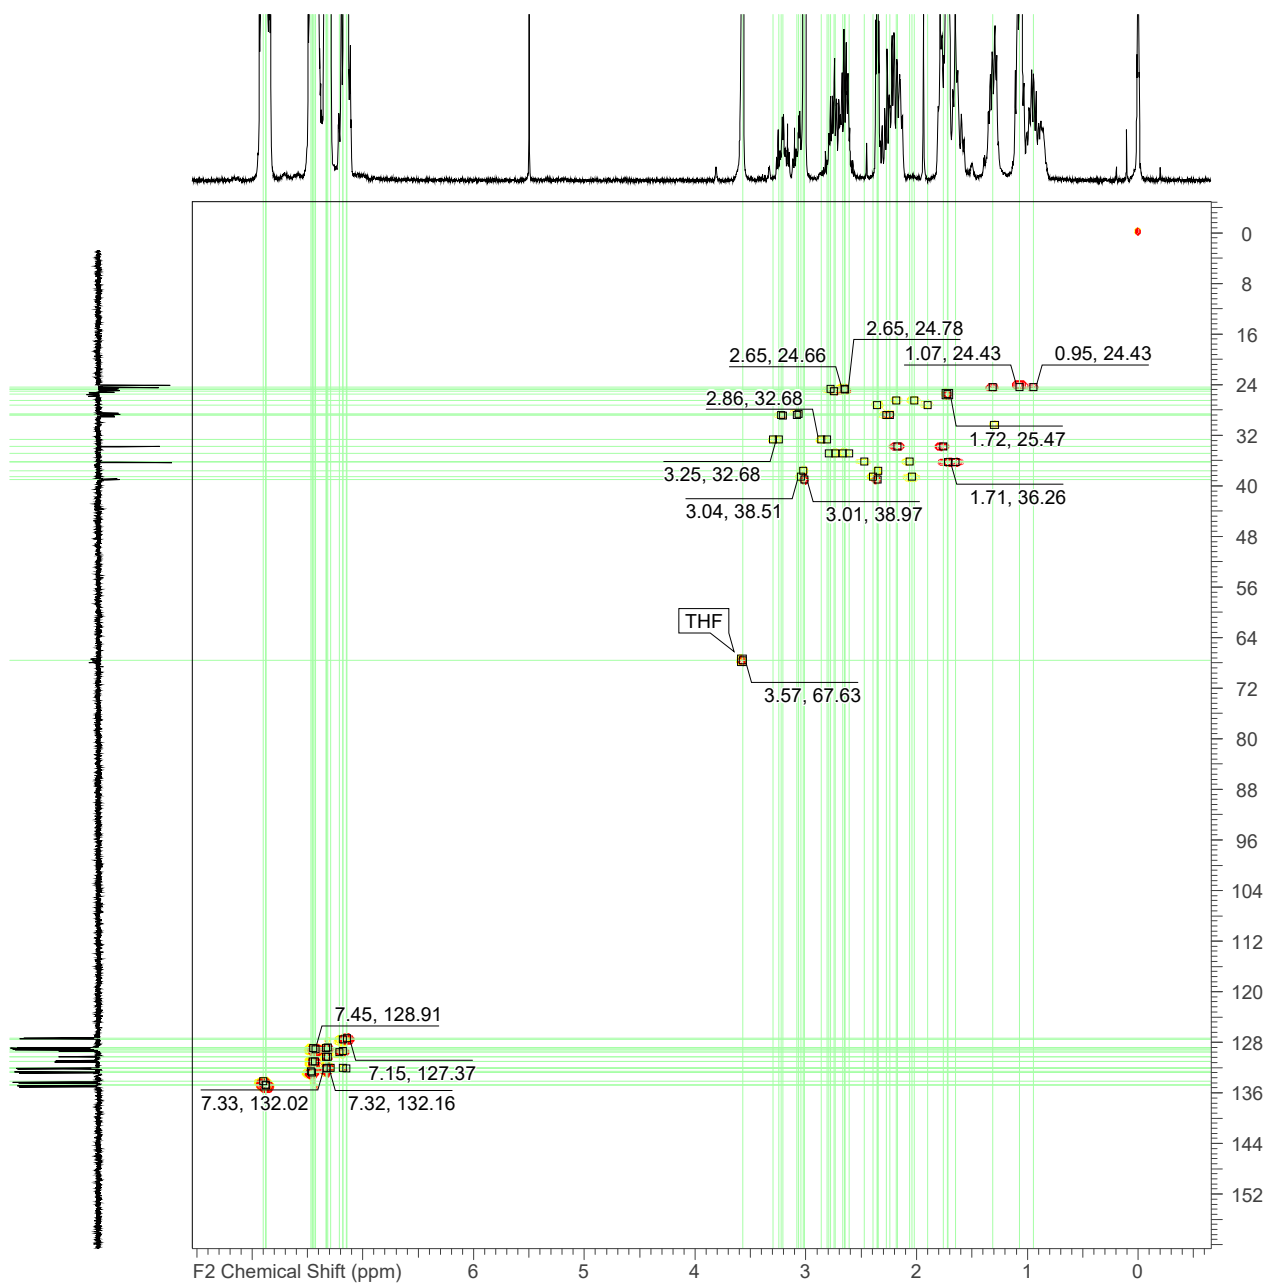

Figure S 7:  $^1\text{H}$ - $^{13}\text{C}$ -HSQC-NMR of  $1^{\text{CH}_2}$  in THF- $d_8$ .

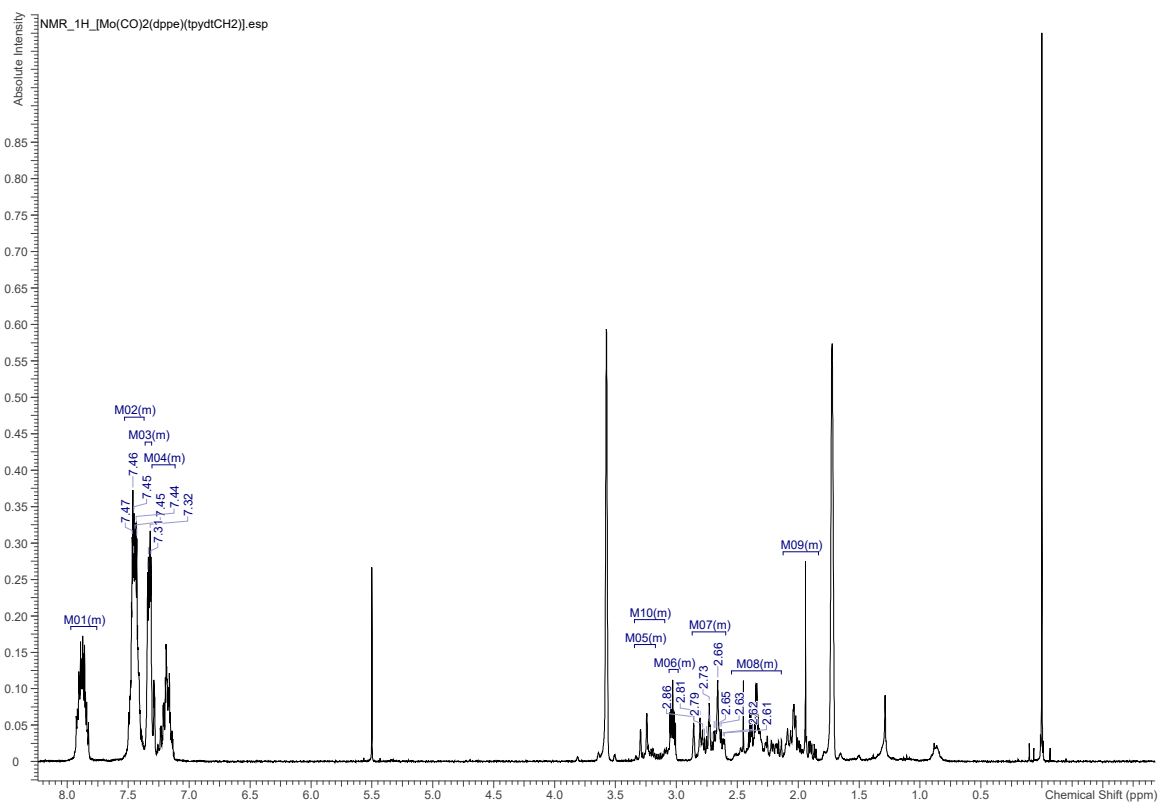

Figure S 8:  $^1\text{H-NMR}$  of  $2^{\text{CH}_2}$  in THF-d8.

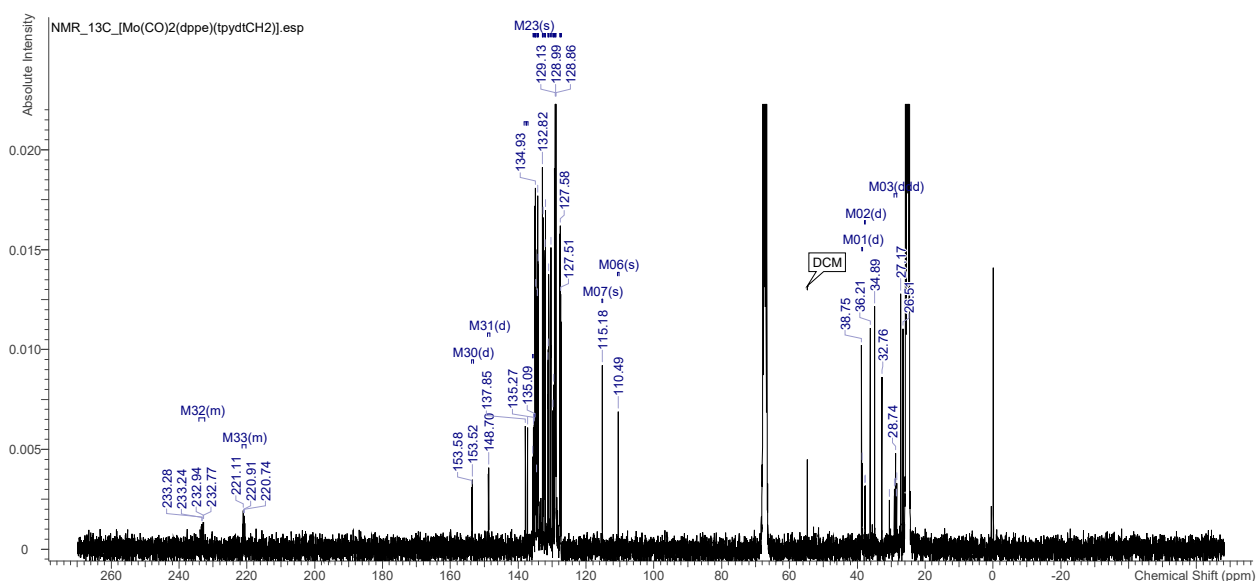

Figure S 9:  $^{13}\text{C-NMR}$  of  $2^{\text{CH}_2}$  in THF-d8.

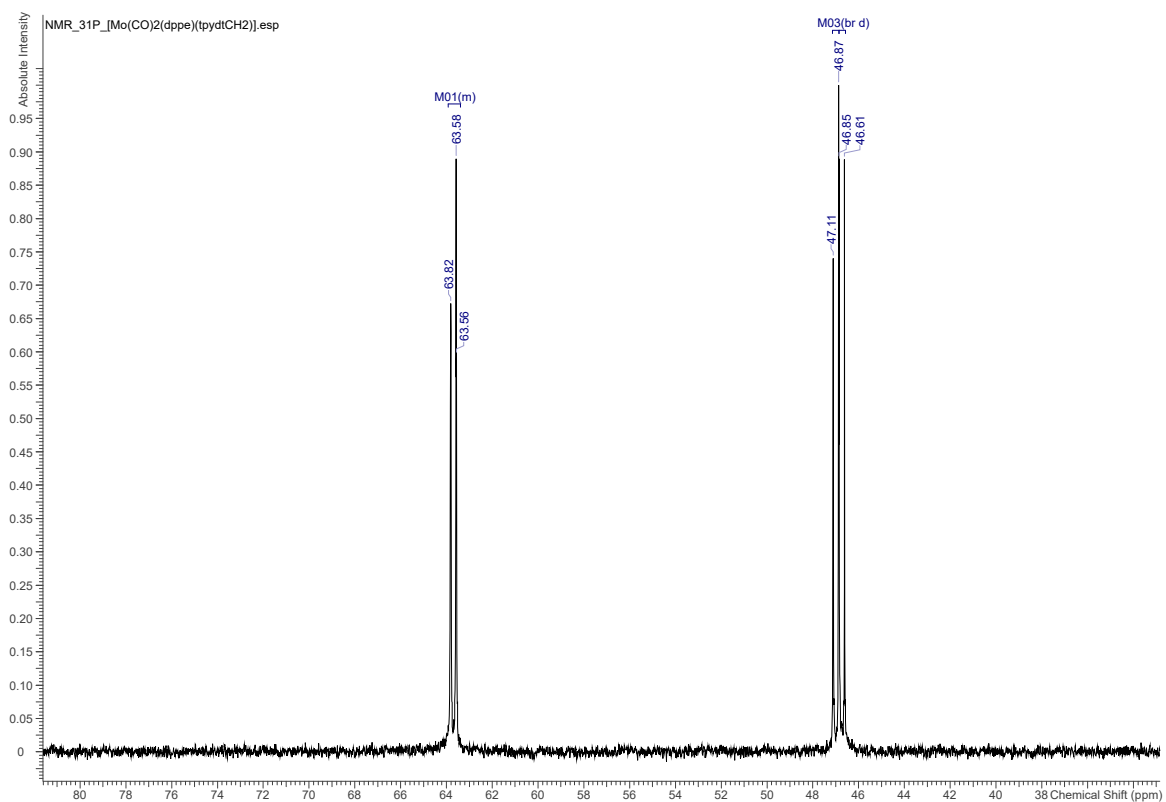

Figure S 10:  $^{31}\text{P}$ -NMR of  $2^{\text{CH}_2}$  in THF-d<sub>8</sub>.

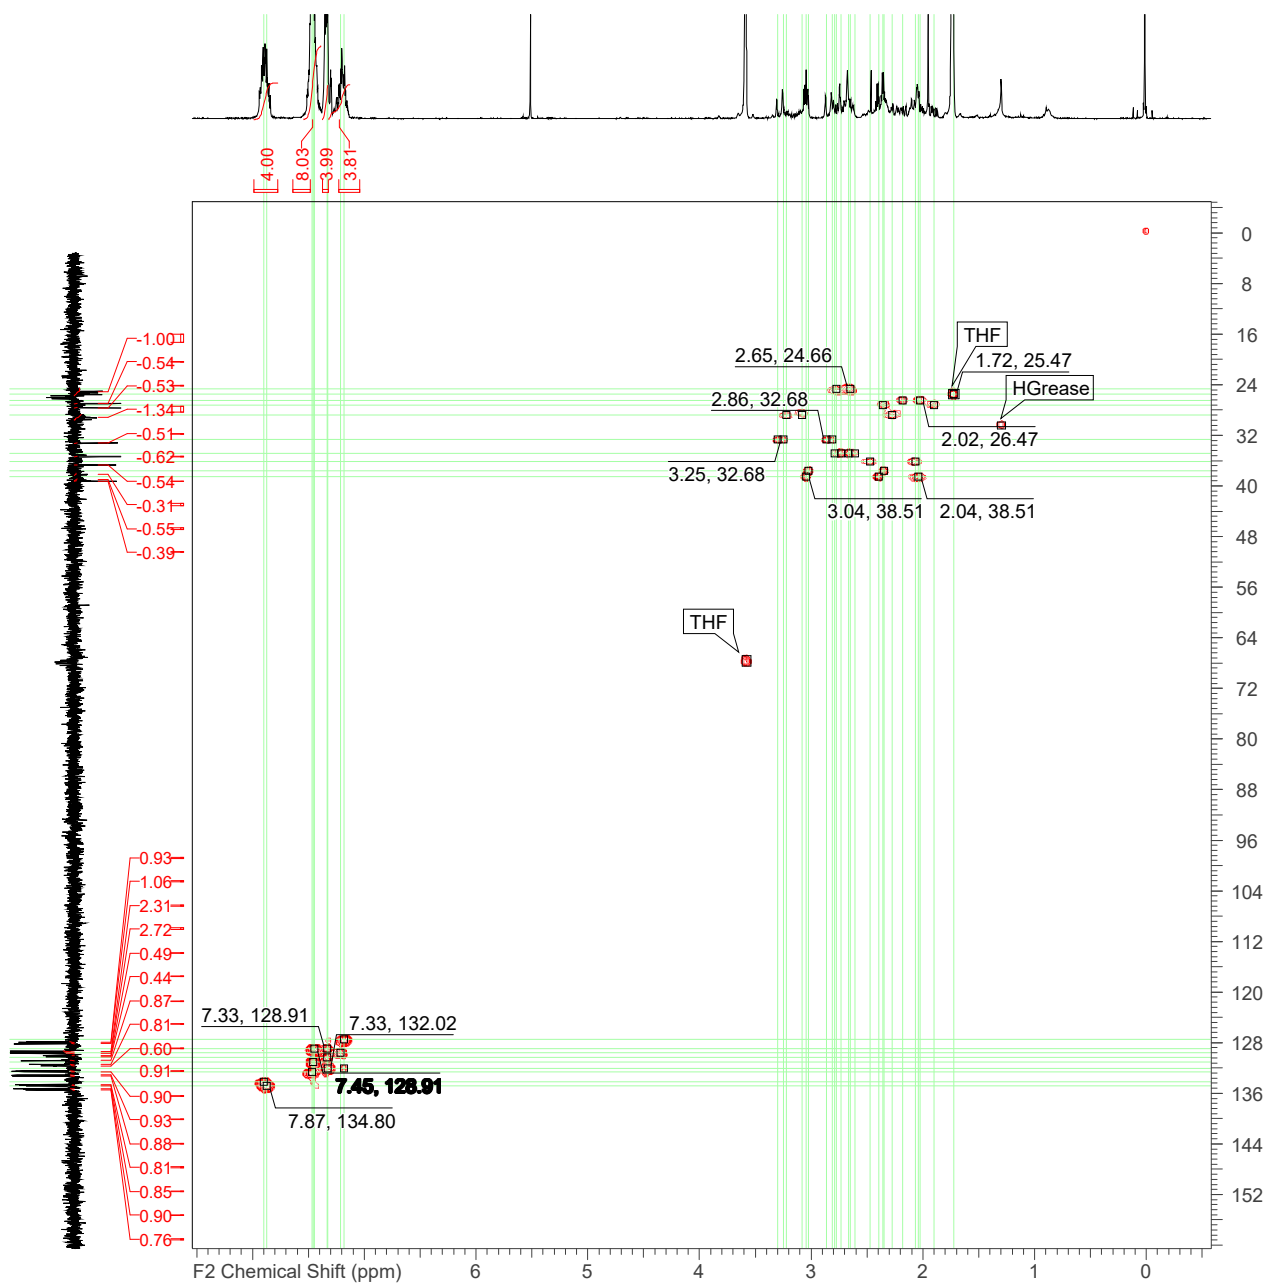

Figure S 11:  $^1\text{H}$ - $^{13}\text{C}$ -HSQC-NMR of  $2^{\text{CH}_2}$  in THF-d<sub>8</sub>.

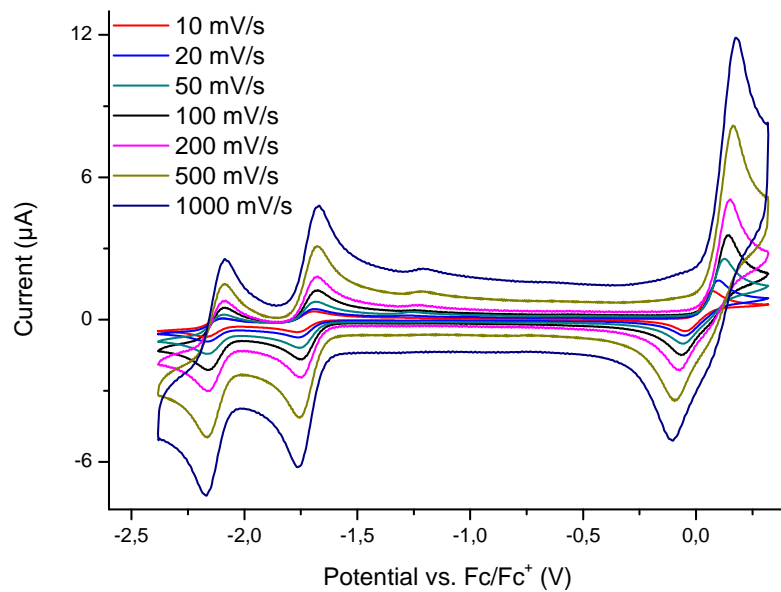

Figure S 12: Scan rate dependent CV's in THF of complex **1** ( $[\text{Mo}(\text{CO})_2(\text{cydt})(\text{dppe})]$ ) (0.32 mM). Electrolyte 0.2 M  $\text{NBu}_4\text{PF}_6$ .

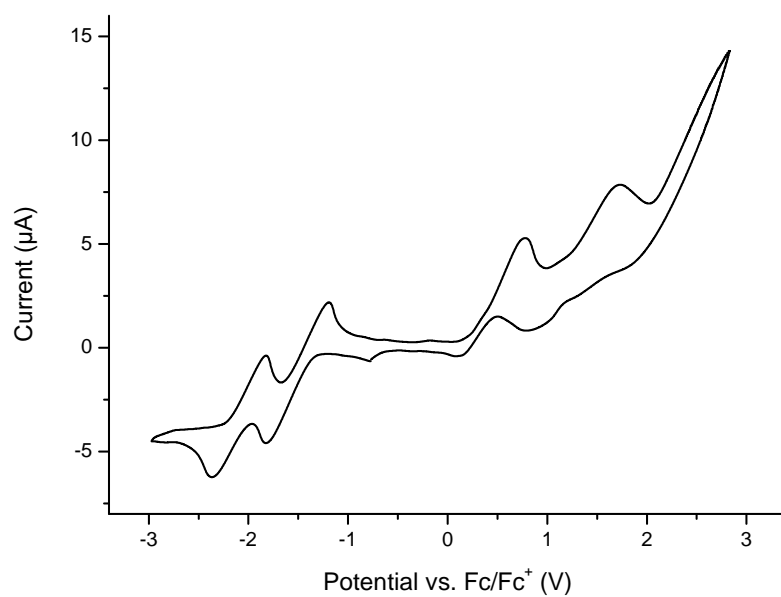

Figure S 13: Cyclic voltammogram of complex **1** ( $[\text{Mo}(\text{CO})_2(\text{cydt})(\text{dppe})]$ ) (3.3 mM) in benzene. Electrolyte 0.165 M  $\text{NHex}_4\text{BF}_4$ ,  $5 \text{ mV s}^{-1}$ .

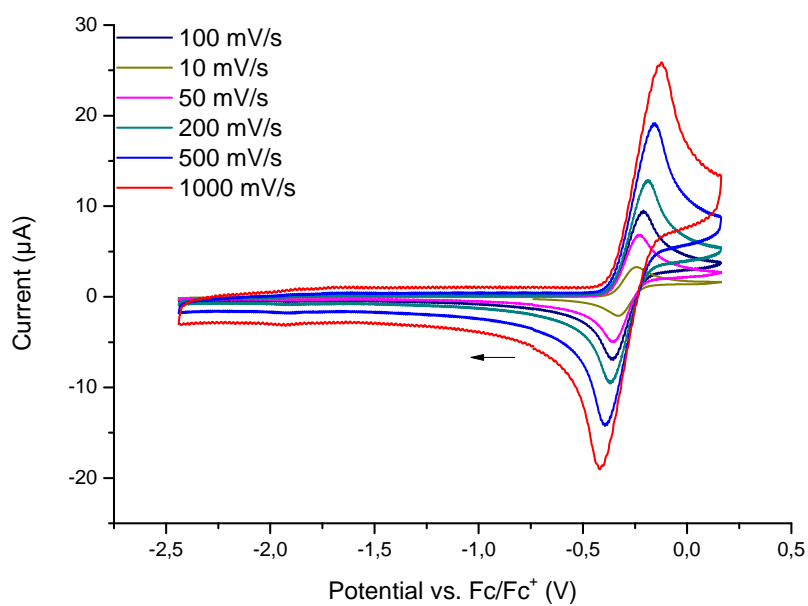

Figure S 14: Cyclic voltammogram of complex  $1^{CH_2}$  ( $[Mo(CO)_2(CH_2-cydt)(dppe)]$ ) in ACN. Electrolyte 0.1 M  $NBu_4PF_6$

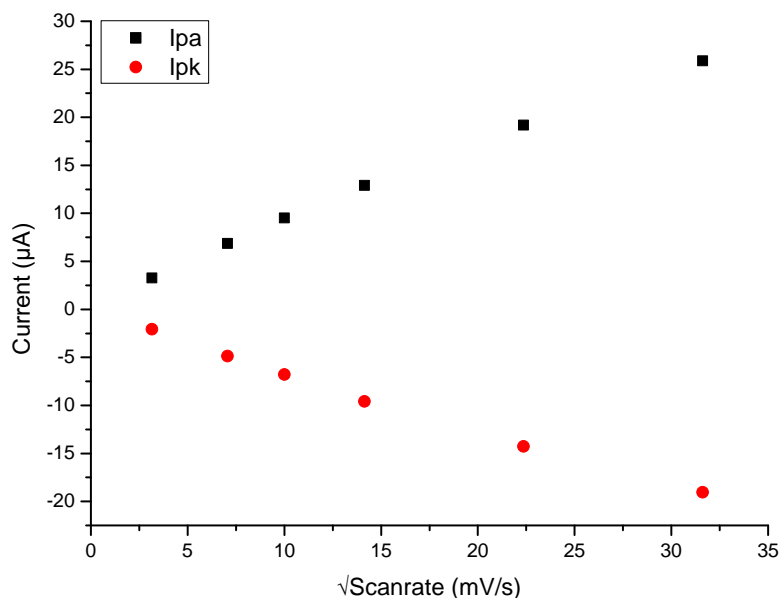

Figure S 15: Plot of the anodic and cathodic peak currents in dependence of the square root of the scan rate. Complex  $1^{CH_2}$  in ACN using 0.1 M  $NBu_4PF_6$ . Data plots are taken from the respective CV measurements in Figure S 14.

### 3 Additional Tables

Table S 1: Selected bond distances and angles of  $[\text{Mo}(\text{CO})_2(\text{cydt}-\text{CH}_2)(\text{dppe})]$  (resolution and accuracy of C-C-bonds at 0.0212 Å) in comparison with the corresponding DFT calculations, the published values of the *King-Bisnette* complex, and the initial complex  $[\text{Mo}(\text{CO})_2(\text{cydt})(\text{dppe})]$  and the corresponding complexes utilising the **tpydt**-ligand. {Mo} represents the  $\{\text{Mo}(\text{CO})_2(\text{dppe})\}$  core.

|                           | {Mo} & cydt<br><b>1</b> | {Mo} & cydt<br><b>1<sup>red</sup></b> | {Mo} & CH <sub>2</sub> -cydt<br><b>1<sup>CH<sub>2</sub></sup></b> |                |         | [MoCp(CO) <sub>2</sub> (π-CH <sub>2</sub> SCH <sub>3</sub> )]<br><b>King-Bisnette</b> | {Mo} & tpydt<br><b>2</b> | {Mo} & CH <sub>2</sub> -tpydt<br><b>2<sup>CH<sub>2</sub></sup></b> |
|---------------------------|-------------------------|---------------------------------------|-------------------------------------------------------------------|----------------|---------|---------------------------------------------------------------------------------------|--------------------------|--------------------------------------------------------------------|
|                           | X-ray                   | DFT<br>Singlet                        | X-ray                                                             | DFT<br>Singlet | Triplet | X-ray                                                                                 | X-ray                    | X-ray                                                              |
| C=C                       | 1.354(17)               | 1.370                                 | 1.340(2)                                                          | 1.367          | 1.376   | -                                                                                     | 1.350(7)                 | 1.337(10)                                                          |
| C4-S1                     | 1.738(12)               | 1.776                                 | 1.779(15)                                                         | 1.788          | 1.772   | 1.820                                                                                 | 1.744(5)                 | 1.793(8)                                                           |
| C9-S2                     | 1.726(13)               | 1.774                                 | 1.751(16)                                                         | 1.752          | 1.756   | -                                                                                     | 1.739(5)                 | 1.760(7)                                                           |
| S1-C3 (CH <sub>2</sub> )  | -                       | -                                     | 1.728(14)                                                         | 1.776          | 1.786   | 1.780                                                                                 | -                        | 1.749(7)                                                           |
| Mo1-C3 (CH <sub>2</sub> ) | -                       | -                                     | 2.210(12)                                                         | 2.241          | 2.247   | 2.240                                                                                 | -                        | 2.207(6)                                                           |
| C1-O1                     | 1.145(15)               | 1.210                                 | 1.150(2)                                                          | 1.176          | 1.178   | 1.180                                                                                 | 1.143(6)                 | 1.150(9)                                                           |
| C2-O2                     | 1.162(16)               | 1.211                                 | 1.189(2)                                                          | 1.189          | 1.179   | 1.200                                                                                 | 1.141(6)                 | 1.140(9)                                                           |
| Mo1-S1                    | 2.351(3)                | 2.536                                 | 2.427(4)                                                          | 2.460          | 2.908   | 2.442                                                                                 | 2.3617(14)               | 2.4155(17)                                                         |
| Mo1-S2                    | 2.404(3)                | 2.601                                 | 2.556(4)                                                          | 2.584          | 2.457   | -                                                                                     | 2.3856(14)               | 2.5504(18)                                                         |
| Mo1-C1                    | 1.973(16)               | 1.930                                 | 1.985(19)                                                         | 1.974          | 1.992   | 1.903                                                                                 | 1.979(5)                 | 1.936(7)                                                           |
| Mo1-C2                    | 1.965(14)               | 1.925                                 | 1.926(15)                                                         | 1.938          | 1.967   | 1.918                                                                                 | 1.977(4)                 | 1.986(7)                                                           |
| Mo1-P1                    | 2.474(3)                | 2.392                                 | 2.495(4)                                                          | 2.494          | 2.530   | -                                                                                     | 2.4839(14)               | 2.4918(17)                                                         |
| Mo1-P2                    | 2.491(3)                | 2.574                                 | 2.528(4)                                                          | 2.547          | 2.610   | -                                                                                     | 2.4743(14)               | 2.5326(17)                                                         |
| Mo-CH <sub>2</sub> -S     | -                       | -                                     | 74.97(2)                                                          | 74.5           | 91.53   | 73.5                                                                                  | -                        | 74.3(2)                                                            |
| S1-Mo1-S2                 | 81.54(10)               | 80.8                                  | 81.88(12)                                                         | 81.4           | 79.0    | -                                                                                     | 81.73(5)                 | 81.79(6)                                                           |
| C1-Mo1-C2                 | 76.7(5)                 | 85.5                                  | 84.3(6)                                                           | 85.4           | 90.3    | -                                                                                     | 80.3(2)                  | 85.9(3)                                                            |
| P1-Mo1-P2                 | 72.28(10)               | 77.7                                  | 77.499(15)                                                        | 77.1           | 76.1    | -                                                                                     | 76.46(4)                 | 77.49(5)                                                           |
| CH <sub>2</sub> -Mo-S     | -                       | -                                     | 43.454(17)                                                        | 44.1           | 84.7    | 44.4                                                                                  | -                        | 44.18(18)                                                          |



Table S 2: Crystal and Refinement Data for crystallized compounds. {Mo} represents the {Mo(CO)<sub>2</sub>(dppe)} core.

|                                                                | <b>1<sup>CH2</sup></b><br>{Mo} & CH <sub>2</sub> -cydt                                         | <b>tpydt</b>                                  | <b>2</b><br>{Mo} & tpydt                                                       | <b>2<sup>CH2</sup></b><br>{Mo} & CH <sub>2</sub> -tpydt                                        |
|----------------------------------------------------------------|------------------------------------------------------------------------------------------------|-----------------------------------------------|--------------------------------------------------------------------------------|------------------------------------------------------------------------------------------------|
| formular                                                       | C <sub>36</sub> H <sub>36</sub> Cl <sub>2</sub> MoO <sub>2</sub> P <sub>2</sub> S <sub>2</sub> | C <sub>6</sub> H <sub>6</sub> OS <sub>3</sub> | C <sub>33</sub> H <sub>30</sub> MoO <sub>2</sub> P <sub>2</sub> S <sub>3</sub> | C <sub>35</sub> H <sub>34</sub> Cl <sub>2</sub> MoO <sub>2</sub> P <sub>2</sub> S <sub>3</sub> |
| CCDC                                                           | 2080179                                                                                        | 2094532                                       | 2094530                                                                        | 2094531                                                                                        |
| formular wt                                                    | 793.55                                                                                         | 190.29                                        | 712.63                                                                         | 811.58                                                                                         |
| temperature, K                                                 | 170(2)                                                                                         | 170(2)                                        | 170(2)                                                                         | 170(2)                                                                                         |
| crystal system                                                 | monoclinic                                                                                     | monoclinic                                    | monoclinic                                                                     | monoclinic                                                                                     |
| space group                                                    | <i>P</i> 2 <sub>1</sub>                                                                        | <i>P</i> 2 <sub>1</sub> / <i>c</i>            | <i>P</i> 2 <sub>1</sub> / <i>c</i>                                             | <i>P</i> 2 <sub>1</sub>                                                                        |
| <i>a</i> , Å                                                   | 8.8543(18)                                                                                     | 11.986(2)                                     | 14.235(3)                                                                      | 8.8426(18)                                                                                     |
| <i>b</i> , Å                                                   | 10.246(2)                                                                                      | 7.7681(16)                                    | 11.186(2)                                                                      | 10.239(2)                                                                                      |
| <i>c</i> , Å                                                   | 19.033(4)                                                                                      | 16.643(3)                                     | 20.632(4)                                                                      | 19.000(4)                                                                                      |
| $\alpha$ , deg.                                                | 90                                                                                             | 90                                            | 90                                                                             | 90                                                                                             |
| $\beta$ , deg.                                                 | 91.12(3)                                                                                       | 100.66                                        | 108.82(3)                                                                      | 90.96(3)                                                                                       |
| $\gamma$ , deg.                                                | 90                                                                                             | 90                                            | 90                                                                             | 90                                                                                             |
| <i>V</i> , Å <sup>3</sup>                                      | 1726.4(6)                                                                                      | 1522.8                                        | 3109.4(12)                                                                     | 1720.1(6)                                                                                      |
| <i>Z</i>                                                       | 2                                                                                              | 8                                             | 4                                                                              | 2                                                                                              |
| density, mg/cm <sup>3</sup>                                    | 1.527                                                                                          | 1.660                                         | 1.522                                                                          | 1.567                                                                                          |
| $\mu$ , mm <sup>-1</sup>                                       | 0.781                                                                                          | 0.894                                         | 0.756                                                                          | 0.844                                                                                          |
| total reflections                                              | 13582                                                                                          | 6120                                          | 35040                                                                          | 19308                                                                                          |
| indep. reflections                                             | 6881                                                                                           | 2109                                          | 8575                                                                           | 8475                                                                                           |
| R1 <sup>a</sup> , wR2 <sup>b</sup><br>( <i>I</i> >2 $\sigma$ ) | 0.0718, 0.1603                                                                                 | 0.0523, 0.1000                                | 0.0559, 0.1295                                                                 | 0.0492, 0.1333                                                                                 |
| R1 <sup>a</sup> , wR2 <sup>b</sup><br>all data                 | 0.1190, 0.1907                                                                                 | 0.1170, 0.1163                                | 0.1135, 0.1706                                                                 | 0.0571, 0.1411                                                                                 |
| Largest diff.<br>peak and hole, e $\cdot$ Å <sup>-3</sup>      | 1.052/ -1.204                                                                                  | 0.312/ -0.327                                 | 1.575/ -1.394                                                                  | 1.209/ -2.179                                                                                  |
| R <sub>int</sub>                                               | 0.1091                                                                                         | 0.1013                                        | 0.0961                                                                         | 0.0493                                                                                         |
| Goof                                                           | 1.031                                                                                          | 0.991                                         | 1.086                                                                          | 1.045                                                                                          |

## 4 Selected Results of the DFT calculations

Table S 3: Löwdin Population Analysis for the HOMO and Natural Population Analysis (NPA) Charges

| Complex                           | Charge | Multiplicity | Orbital composition |               |              |              | NPA charges  |       |       |       |
|-----------------------------------|--------|--------------|---------------------|---------------|--------------|--------------|--------------|-------|-------|-------|
|                                   |        |              | Mo                  | S1 (trans-CO) | S2 (trans-P) | CO (trans-P) | CO (trans-S) | Mo    | S(1)  | S(2)  |
| <b>1</b>                          | 0      | 1            | 37.3                | 4.1           | 7.5          | 13.2         | 14.3         | -0.73 | 0.07  | -0.06 |
| <b>1<sup>red</sup></b>            | -2     | 1            | 18.6                | 21.1          | 13.8         | 9.1          | 2.4          | -1.00 | -0.32 | -0.23 |
| <b>1<sup>CH<sub>2</sub></sup></b> | 0      | 1            | 23.4                | 31.7          | <1           | 3.2          | 9.5          | -0.89 | -0.18 | 0.53  |
| <b>1<sup>CH<sub>2</sub></sup></b> | 0      | 3            | 41.9                | 12.7          | <1           | 8.2          | 14.6         | -     | -     | -     |

Table S 4: Calculated Energies ( $E_h$ ) for all relevant complexes.

| complex                                                | Charge | Multiplicity | Thermal energy | Enthalpy   | Entropy | Gibbs free enthalpy |
|--------------------------------------------------------|--------|--------------|----------------|------------|---------|---------------------|
| <b>[Mo(CO)<sub>2</sub>(cydt)(dppe)]<sup>2-</sup></b>   | -2     | 1            | -3011.8306     | -3011.8297 | 0.1077  | -3011.9374          |
| <b>[Mo(CO)<sub>2</sub>(cydt)(dppe)]</b>                | 0      | 1            | -3011.8205     | -3011.8196 | 0.1063  | -3011.9258          |
| <b>[Mo(CO)<sub>2</sub>(CH<sub>2</sub>-cydt)(dppe)]</b> | 0      | 1            | -3051.0455     | -3051.0446 | 0.1075  | -3051.1521          |
| <b>[Mo(CO)<sub>2</sub>(CH<sub>2</sub>-cydt)(dppe)]</b> | 0      | 3            | -3050.9932     | -3050.9923 | 0.1106  | -3051.1029          |

Table S 5: Calculated Vibrational Frequencies of [Mo(CO)<sub>2</sub>(CH<sub>2</sub>-cydt)(dppe)] **1<sup>CH<sub>2</sub></sup>**

| Spin-Multiplicity: 1 |                        |                |           |           |           | Spin-Multiplicity: 3 |                        |                |           |           |           |
|----------------------|------------------------|----------------|-----------|-----------|-----------|----------------------|------------------------|----------------|-----------|-----------|-----------|
| #                    | freq /cm <sup>-1</sup> | T <sup>2</sup> | TX        | TY        | TZ        | #                    | freq /cm <sup>-1</sup> | T <sup>2</sup> | TX        | TY        | TZ        |
| 6                    | 20.27                  | 0.166552       | 0.234563  | 0.269283  | -0.197532 | 6                    | 16.71                  | 0.135329       | 0.331138  | -0.085507 | -0.135519 |
| 7                    | 29.24                  | 0.123621       | -0.14972  | -0.090151 | 0.305086  | 7                    | 24.96                  | 0.292851       | 0.071645  | 0.46409   | -0.268959 |
| 8                    | 34.95                  | 0.330062       | -0.116552 | 0.561043  | 0.041327  | 8                    | 34.15                  | 0.103984       | 0.297938  | -0.107979 | -0.059642 |
| 9                    | 41.34                  | 0.40785        | -0.432167 | 0.468846  | -0.035564 | 9                    | 41.03                  | 0.366917       | -0.561955 | 0.225908  | -0.009485 |
| 10                   | 48.33                  | 0.216296       | 0.447674  | -0.045023 | -0.117716 | 10                   | 44.12                  | 0.783207       | 0.786082  | -0.302875 | -0.271199 |

to be continued

Table S 5: Calculated Vibrational Frequencies - continued from above

| #  | freq /cm <sup>-1</sup> | T <sup>2</sup> | TX        | TY        | TZ        | #  | freq /cm <sup>-1</sup> | T <sup>2</sup> | TX        | TY        | TZ        |
|----|------------------------|----------------|-----------|-----------|-----------|----|------------------------|----------------|-----------|-----------|-----------|
| 11 | 51.46                  | 0.311984       | 0.148019  | 0.138267  | 0.520534  | 11 | 47.96                  | 0.05423        | -0.073104 | -0.22021  | -0.019843 |
| 12 | 53.36                  | 0.288734       | 0.34408   | -0.382914 | -0.15401  | 12 | 49.6                   | 0.511356       | 0.175538  | 0.27102   | 0.638036  |
| 13 | 57.21                  | 0.114234       | -0.006005 | 0.33543   | -0.041045 | 13 | 52.27                  | 0.061568       | 0.082834  | 0.213492  | -0.095542 |
| 14 | 66.94                  | 0.193692       | 0.111316  | 0.047509  | -0.423135 | 14 | 60.25                  | 0.293041       | -0.296223 | 0.008355  | -0.453015 |
| 15 | 69.38                  | 0.031735       | -0.170578 | 0.045399  | 0.024022  | 15 | 64.29                  | 0.501472       | -0.46651  | -0.413724 | -0.335667 |
| 16 | 70.33                  | 0.237271       | -0.221195 | -0.385312 | -0.199697 | 16 | 68.33                  | 0.284685       | 0.440286  | 0.265982  | 0.141726  |
| 17 | 78.03                  | 0.274561       | 0.162519  | 0.173335  | 0.467015  | 17 | 74.17                  | 0.194649       | -0.137034 | -0.059243 | -0.415164 |
| 18 | 90.26                  | 0.166999       | 0.144001  | 0.194502  | -0.32929  | 18 | 81.48                  | 2.902146       | -1.008739 | -1.04249  | -0.8932   |
| 19 | 95.94                  | 1.381704       | -0.195493 | -1.146845 | -0.168023 | 19 | 84.75                  | 0.907132       | 0.604012  | 0.735851  | -0.028725 |
| 20 | 97.97                  | 0.584809       | 0.274423  | 0.649717  | -0.295582 | 20 | 90.83                  | 0.341058       | -0.538216 | -0.086803 | -0.209397 |
| 21 | 100.85                 | 0.605119       | -0.599076 | -0.241893 | 0.433261  | 21 | 93.81                  | 0.21345        | -0.079515 | -0.211177 | -0.403151 |
| 22 | 108.07                 | 0.325318       | -0.515861 | -0.242479 | -0.020238 | 22 | 99.63                  | 1.157978       | -1.05575  | -0.048494 | -0.202531 |
| 23 | 109.71                 | 0.655628       | -0.31004  | 0.546556  | -0.510666 | 23 | 100.78                 | 0.219339       | -0.09051  | -0.228723 | -0.398538 |
| 24 | 115.51                 | 0.808277       | -0.531653 | 0.256369  | 0.678156  | 24 | 108.01                 | 0.571833       | 0.384725  | -0.029902 | 0.650327  |
| 25 | 121.78                 | 0.706455       | 0.810296  | -0.167499 | 0.147712  | 25 | 111.27                 | 0.900572       | -0.910222 | -0.110873 | 0.244489  |
| 26 | 130.18                 | 1.246113       | 0.711167  | 0.815009  | -0.275889 | 26 | 123.04                 | 0.178153       | 0.037468  | 0.338598  | -0.2492   |
| 27 | 139.83                 | 0.103527       | 0.006849  | 0.294793  | -0.128752 | 27 | 128.8                  | 0.798632       | -0.491768 | 0.014296  | 0.746051  |
| 28 | 151.51                 | 1.662558       | -0.586725 | -0.123816 | 1.141482  | 28 | 137.51                 | 0.128431       | -0.103535 | -0.256486 | 0.227873  |
| 29 | 160.82                 | 1.57667        | 0.305473  | 0.22398   | -1.197159 | 29 | 147.48                 | 0.564401       | -0.66901  | -0.310195 | 0.143546  |
| 30 | 173.97                 | 1.44273        | 0.84185   | -0.122403 | 0.847959  | 30 | 153.41                 | 0.372521       | -0.577045 | 0.181621  | -0.080955 |
| 31 | 188.07                 | 0.147194       | 0.10046   | 0.366584  | 0.052128  | 31 | 174.25                 | 0.814311       | 0.773908  | -0.404227 | 0.227986  |
| 32 | 197.23                 | 0.855457       | -0.275021 | 0.834656  | 0.288393  | 32 | 178.08                 | 0.950334       | -0.310579 | 0.414361  | 0.825942  |
| 33 | 206.47                 | 0.505967       | 0.22553   | -0.174399 | 0.651681  | 33 | 192.83                 | 2.469246       | -0.64949  | 0.97676   | 1.045633  |
| 34 | 214.08                 | 1.881806       | -1.065583 | -0.779674 | 0.372085  | 34 | 205.36                 | 0.248705       | 0.047968  | 0.388839  | -0.308559 |
| 35 | 223.25                 | 1.60646        | -0.913916 | -0.418681 | 0.771962  | 35 | 206.14                 | 1.850378       | 1.107461  | 0.600331  | 0.513334  |
| 36 | 227.53                 | 0.116579       | -0.285236 | -0.185456 | 0.028723  | 36 | 217.82                 | 2.507512       | -1.004612 | -0.457502 | 1.135323  |
| 37 | 231.01                 | 1.321951       | -0.058872 | -1.106827 | 0.305646  | 37 | 227.64                 | 2.410941       | 0.771369  | 1.165258  | -0.676835 |
| 38 | 248.36                 | 0.234194       | -0.19138  | 0.438764  | 0.07109   | 38 | 246.52                 | 0.768637       | -0.42317  | 0.758455  | 0.119622  |
| 39 | 262                    | 0.570536       | -0.364107 | 0.522463  | 0.406195  | 39 | 256.54                 | 0.617585       | -0.17636  | 0.512304  | 0.569233  |
| 40 | 265.52                 | 0.396607       | 0.475192  | 0.303439  | 0.280579  | 40 | 262.51                 | 0.027312       | 0.099578  | -0.094398 | 0.092115  |
| 41 | 279.5                  | 1.349582       | -1.087285 | -0.09336  | -0.398343 | 41 | 264.86                 | 1.769665       | 0.515     | 1.217934  | -0.145176 |
| 42 | 304.83                 | 2.090908       | -0.304712 | -1.347968 | -0.425488 | 42 | 283.46                 | 1.390802       | -1.146163 | -0.275669 | -0.033439 |
| 43 | 310.84                 | 1.403534       | -0.001962 | 1.154747  | -0.264745 | 43 | 302.63                 | 0.47564        | 0.491154  | 0.051802  | -0.481378 |
| 44 | 319.3                  | 2.34781        | 1.510717  | -0.189413 | 0.172243  | 44 | 313.56                 | 5.23584        | 2.253753  | 0.334059  | 0.211756  |

to be continued

Table S 5: Calculated Vibrational Frequencies - continued from above

| #  | freq /cm <sup>-1</sup> | T <sup>2</sup> | TX        | TY        | TZ        | #  | freq /cm <sup>-1</sup> | T <sup>2</sup> | TX        | TY        | TZ        |
|----|------------------------|----------------|-----------|-----------|-----------|----|------------------------|----------------|-----------|-----------|-----------|
| 45 | 336.81                 | 3.504323       | -1.842425 | 0.058461  | 0.326155  | 45 | 329.96                 | 3.090254       | -1.441066 | -0.762342 | 0.657585  |
| 46 | 341.06                 | 1.97511        | -0.955488 | -0.526844 | -0.88577  | 46 | 331.26                 | 8.276412       | 2.354649  | 1.576148  | 0.497791  |
| 47 | 353.26                 | 7.231203       | -2.44568  | -0.726182 | 0.850006  | 47 | 336.34                 | 2.266009       | -1.297147 | 0.566438  | 0.512411  |
| 48 | 361.58                 | 12.978921      | -0.750378 | -2.341019 | -2.633531 | 48 | 362.44                 | 12.756615      | -1.031936 | -2.217391 | -2.602864 |
| 49 | 394.01                 | 0.028185       | -0.044658 | -0.030182 | 0.158998  | 49 | 396.36                 | 0.045121       | -0.005821 | -0.024538 | 0.210915  |
| 50 | 395.99                 | 0.357947       | 0.188997  | 0.434197  | -0.36565  | 50 | 396.88                 | 0.394764       | -0.098966 | -0.423927 | 0.453051  |
| 51 | 400.9                  | 1.804881       | 0.881431  | 0.179087  | -0.997942 | 51 | 399.82                 | 5.55941        | 1.658693  | 0.52271   | -1.592144 |
| 52 | 404.3                  | 9.182167       | 2.231331  | 0.63701   | -1.948729 | 52 | 400.37                 | 8.169023       | 2.013896  | 0.532531  | -1.95695  |
| 53 | 405.3                  | 2.455814       | 1.11558   | 0.118085  | -1.094235 | 53 | 406.07                 | 0.198429       | 0.315913  | 0.284337  | -0.133342 |
| 54 | 409.82                 | 12.494726      | 1.698275  | 0.05844   | -3.099544 | 54 | 409.6                  | 3.914138       | 1.598746  | 0.025616  | -1.165115 |
| 55 | 420.79                 | 5.804167       | 1.762101  | -0.189211 | 1.631982  | 55 | 411.31                 | 13.755543      | -2.295443 | -0.320067 | -2.895521 |
| 56 | 429.17                 | 14.21236       | 1.10521   | -0.872425 | 3.497105  | 56 | 419.51                 | 2.828017       | -0.093148 | -1.663578 | 0.227703  |
| 57 | 440.5                  | 19.579252      | 3.292191  | 2.397846  | 1.72947   | 57 | 431.85                 | 1.091373       | 0.848485  | 0.451093  | -0.40983  |
| 58 | 447.89                 | 0.234133       | 0.29953   | -0.311759 | -0.217306 | 58 | 443.83                 | 5.54656        | 0.273954  | -2.056294 | 1.114973  |
| 59 | 465.46                 | 3.469285       | -0.46363  | 1.657707  | 0.711575  | 59 | 448.43                 | 4.06736        | -1.132268 | -1.649996 | -0.250686 |
| 60 | 474.49                 | 8.509693       | -0.907936 | -2.216798 | 1.664677  | 60 | 464.83                 | 3.579941       | 0.340178  | 1.727127  | 0.693723  |
| 61 | 484.02                 | 10.35895       | -1.487817 | -2.802637 | 0.53905   | 61 | 470.34                 | 2.629961       | -0.732004 | 0.780046  | -1.218876 |
| 62 | 488.06                 | 36.190421      | 5.278493  | 0.871557  | -2.751058 | 62 | 477.14                 | 4.871203       | 0.434961  | -2.152757 | 0.21829   |
| 63 | 496.35                 | 1.803621       | 0.713211  | -0.322853 | -1.0912   | 63 | 483.58                 | 0.705614       | 0.263334  | -0.568416 | 0.559619  |
| 64 | 502.36                 | 18.29764       | 2.247973  | 0.853707  | 3.537717  | 64 | 486.29                 | 44.141885      | 5.571345  | 1.060924  | -3.4607   |
| 65 | 508.66                 | 20.7083        | -3.626533 | -0.12572  | -2.746043 | 65 | 490.95                 | 13.949224      | -2.98792  | -0.868319 | 2.065813  |
| 66 | 513.12                 | 40.860167      | 4.504241  | 4.462388  | 0.811836  | 66 | 496.68                 | 7.460097       | -2.066159 | -0.759751 | 1.616745  |
| 67 | 515.55                 | 44.038064      | 0.707894  | -4.001338 | -5.246546 | 67 | 504.15                 | 16.106463      | -0.313128 | 3.184398  | 2.4224    |
| 68 | 528.19                 | 54.542481      | -3.492223 | -3.719484 | -5.339691 | 68 | 507.1                  | 37.04066       | -5.243754 | -1.758223 | -2.540149 |
| 69 | 531.44                 | 5.000554       | 0.158291  | -1.743824 | 1.39089   | 69 | 519.13                 | 82.71094       | -4.009598 | -5.01228  | -6.442911 |
| 70 | 583.6                  | 2.169921       | 0.829636  | 0.984624  | 0.71564   | 70 | 531.74                 | 6.140693       | 1.599534  | 0.85137   | 1.690371  |
| 71 | 592.65                 | 34.604534      | 5.156624  | 2.08198   | 1.918104  | 71 | 575.71                 | 0.265124       | 0.373651  | -0.245401 | -0.255515 |
| 72 | 607.05                 | 8.381954       | -1.406805 | 2.238415  | 1.17998   | 72 | 584.95                 | 27.340787      | -0.133322 | 4.896937  | 1.828393  |
| 73 | 607.66                 | 0.947966       | -0.523511 | 0.817459  | -0.075261 | 73 | 608.3                  | 0.579491       | -0.504854 | 0.232212  | -0.52028  |
| 74 | 609.09                 | 2.26665        | 0.878577  | 1.116104  | 0.499064  | 74 | 608.63                 | 2.027215       | 1.352257  | 0.295225  | -0.333853 |
| 75 | 610.94                 | 1.276343       | 0.773364  | -0.356927 | 0.742196  | 75 | 609.81                 | 0.494811       | -0.217594 | 0.181655  | 0.643789  |
| 76 | 613.98                 | 11.972871      | -0.278234 | -3.272737 | -1.088415 | 76 | 610.91                 | 0.231085       | 0.278969  | 0.123394  | 0.371531  |
| 77 | 635.97                 | 37.037242      | -4.443085 | -1.291491 | 3.953263  | 77 | 631.5                  | 32.105558      | -4.46666  | -0.719059 | 3.411372  |
| 78 | 662.46                 | 21.893115      | -4.189578 | 0.927389  | -1.865611 | 78 | 649.79                 | 20.87315       | -3.954772 | 0.417496  | -2.249138 |

to be continued

Table S 5: Calculated Vibrational Frequencies - continued from above

| #   | freq /cm <sup>-1</sup> | T <sup>2</sup> | TX        | TY        | TZ        | #   | freq /cm <sup>-1</sup> | T <sup>2</sup> | TX        | TY        | TZ        |
|-----|------------------------|----------------|-----------|-----------|-----------|-----|------------------------|----------------|-----------|-----------|-----------|
| 79  | 689.2                  | 6.99192        | 0.641515  | 0.86044   | 2.416614  | 79  | 652.66                 | 0.15308        | -0.291063 | 0.051373  | 0.256365  |
| 80  | 690.78                 | 15.687459      | 3.341127  | -1.310353 | -1.6755   | 80  | 685.19                 | 3.483428       | 0.050888  | -0.605115 | 1.764844  |
| 81  | 691.39                 | 16.959457      | -3.486906 | -0.709368 | 2.073099  | 81  | 688.32                 | 3.763978       | -0.35994  | 0.901367  | 1.679869  |
| 82  | 693.37                 | 40.351385      | 4.867387  | 2.633677  | 3.118281  | 82  | 690.73                 | 31.123745      | 5.150152  | -0.405373 | -2.106027 |
| 83  | 698.08                 | 35.778401      | -3.516243 | -2.219785 | 4.29965   | 83  | 692.85                 | 28.264302      | -4.638666 | -1.313648 | -2.24085  |
| 84  | 700.24                 | 22.97245       | 2.842174  | -1.971898 | -3.317547 | 84  | 694.78                 | 7.660871       | 1.78016   | 1.074031  | -1.827117 |
| 85  | 702.39                 | 11.539367      | -1.40012  | -2.980523 | -0.833975 | 85  | 697                    | 11.841895      | 2.289578  | 2.313032  | -1.117859 |
| 86  | 703.99                 | 29.321486      | -3.887289 | -0.548386 | -3.729576 | 86  | 698.79                 | 26.013665      | -2.226758 | 1.84599   | 4.200897  |
| 87  | 730.67                 | 0.962014       | -0.877741 | -0.183149 | -0.397544 | 87  | 702.07                 | 26.497633      | 3.006428  | 0.201165  | 4.173554  |
| 88  | 736.12                 | 1.186518       | -1.038963 | -0.206783 | -0.253602 | 88  | 716.64                 | 6.674882       | -0.875294 | -0.242828 | -2.418631 |
| 89  | 737.64                 | 10.285973      | 3.104085  | -0.791686 | -0.154471 | 89  | 735.23                 | 2.97133        | 1.708134  | -0.11921  | 0.198488  |
| 90  | 741.07                 | 9.030784       | -2.689911 | 1.08162   | -0.790733 | 90  | 737.53                 | 13.365605      | -3.425439 | 0.649145  | -1.100264 |
| 91  | 743.68                 | 6.297684       | -0.174272 | -0.113159 | 2.500902  | 91  | 742.77                 | 9.326575       | -0.230055 | 1.226008  | -2.787571 |
| 92  | 746.63                 | 4.225467       | 1.501386  | -1.171713 | -0.773559 | 92  | 745.23                 | 3.920433       | 1.101855  | -0.738735 | -1.469904 |
| 93  | 783.32                 | 2.393797       | -1.291509 | -0.849507 | -0.06433  | 93  | 782.8                  | 1.662341       | -0.976637 | 0.841112  | -0.032407 |
| 94  | 799.63                 | 41.513442      | -1.733186 | 1.146804  | 6.098717  | 94  | 790.71                 | 41.719182      | -0.228056 | 1.668469  | 6.235654  |
| 95  | 805.25                 | 2.704717       | -0.742222 | -1.438536 | -0.290581 | 95  | 803.76                 | 2.969455       | 1.036294  | 1.375274  | -0.064579 |
| 96  | 824.41                 | 2.986085       | 0.16636   | -0.137451 | 1.714502  | 96  | 825.21                 | 1.26749        | 0.493139  | 0.914482  | -0.43362  |
| 97  | 825.92                 | 1.52832        | 0.567032  | 0.996692  | -0.461951 | 97  | 828.74                 | 1.936928       | -0.019552 | 0.470946  | -1.309487 |
| 98  | 840.7                  | 0.319385       | 0.25239   | 0.505048  | 0.024708  | 98  | 837.98                 | 0.747802       | 0.146331  | 0.828831  | 0.198567  |
| 99  | 842.1                  | 1.883552       | -1.054675 | -0.772786 | 0.417151  | 99  | 840.37                 | 1.435871       | -0.770733 | -0.914432 | 0.075205  |
| 100 | 850.27                 | 2.236682       | 1.087012  | 0.781691  | 0.666368  | 100 | 854.75                 | 1.868226       | 0.609816  | 1.067647  | 0.59706   |
| 101 | 863.32                 | 25.148358      | 4.98818   | 0.387214  | -0.341299 | 101 | 860                    | 16.914294      | 4.074995  | 0.412406  | 0.372328  |
| 102 | 882.88                 | 0.022627       | -0.080843 | 0.076143  | 0.101458  | 102 | 878.13                 | 0.270053       | -0.289639 | -0.082416 | 0.423521  |
| 103 | 898.12                 | 0.310946       | 0.253176  | -0.333303 | -0.368452 | 103 | 896.22                 | 2.02162        | 0.697404  | -0.778115 | -0.964254 |
| 104 | 898.53                 | 0.205922       | -0.279596 | -0.014286 | 0.357134  | 104 | 898.32                 | 0.330585       | -0.514718 | -0.209336 | 0.147746  |
| 105 | 919.13                 | 0.171919       | 0.311     | -0.252236 | -0.10759  | 105 | 915.85                 | 0.37198        | 0.499399  | -0.288208 | 0.198788  |
| 106 | 920.67                 | 0.875524       | 0.465225  | -0.785369 | -0.205635 | 106 | 917.8                  | 0.938271       | -0.426086 | 0.840592  | 0.223893  |
| 107 | 937.38                 | 1.906564       | 0.767487  | 0.163041  | 1.136198  | 107 | 940.76                 | 1.051801       | 0.412369  | 0.073597  | -0.936128 |
| 108 | 943.76                 | 5.3338         | 1.817143  | 1.06346   | 0.949128  | 108 | 947.37                 | 4.833742       | 0.743757  | 1.057374  | 1.77835   |
| 109 | 955.02                 | 2.768913       | 0.848478  | -0.200781 | 1.417281  | 109 | 956.62                 | 0.242203       | 0.137084  | -0.47216  | -0.021819 |
| 110 | 956.08                 | 3.694501       | 0.098455  | 0.536654  | -1.843044 | 110 | 957.41                 | 0.10552        | 0.212388  | 0.202042  | -0.139965 |
| 111 | 957.22                 | 0.516519       | 0.021702  | -0.447515 | -0.561941 | 111 | 961.83                 | 0.307277       | 0.312703  | 0.355438  | 0.288371  |
| 112 | 960.7                  | 6.92316        | 1.92026   | 1.797282  | -0.074422 | 112 | 968.02                 | 0.85897        | 0.161563  | 0.912179  | 0.028238  |

to be continued

Table S 5: Calculated Vibrational Frequencies - continued from above

| #   | freq /cm <sup>-1</sup> | T <sup>2</sup> | TX        | TY        | TZ        | #   | freq /cm <sup>-1</sup> | T <sup>2</sup> | TX        | TY        | TZ        |
|-----|------------------------|----------------|-----------|-----------|-----------|-----|------------------------|----------------|-----------|-----------|-----------|
| 113 | 969.81                 | 0.01344        | 0.064155  | 0.064403  | 0.071947  | 113 | 969.7                  | 0.981491       | 0.352433  | 0.917269  | 0.126092  |
| 114 | 971.3                  | 1.049049       | -0.480149 | -0.894547 | 0.135249  | 114 | 974.12                 | 2.896137       | -0.279478 | -0.562304 | -1.581722 |
| 115 | 980.71                 | 1.392036       | -0.510435 | -0.715623 | 0.787004  | 115 | 980.48                 | 0.708709       | -0.260126 | -0.094704 | 0.795031  |
| 116 | 981.54                 | 0.608471       | 0.298662  | 0.702024  | 0.162586  | 116 | 980.65                 | 0.524729       | 0.313977  | 0.561081  | -0.333671 |
| 117 | 982.65                 | 1.127485       | -0.766292 | -0.681318 | 0.275837  | 117 | 982.17                 | 1.204156       | 0.885477  | 0.647489  | 0.029062  |
| 118 | 983.13                 | 0.40258        | 0.317168  | -0.281049 | -0.472225 | 118 | 982.57                 | 0.308754       | 0.353549  | 0.201243  | -0.378495 |
| 119 | 983.26                 | 2.280089       | -0.75466  | -1.101951 | -0.704472 | 119 | 983.47                 | 0.572001       | -0.593009 | -0.363072 | 0.297523  |
| 120 | 984.08                 | 0.299081       | -0.17573  | 0.057997  | 0.514623  | 120 | 983.78                 | 1.539115       | -0.6234   | -0.866719 | -0.63189  |
| 121 | 991.16                 | 0.632107       | -0.301624 | -0.69199  | 0.249559  | 121 | 990.1                  | 0.514942       | -0.163084 | -0.698741 | 0.010355  |
| 122 | 993.31                 | 0.241512       | -0.311672 | -0.265867 | 0.271454  | 122 | 991.22                 | 0.190801       | 0.178201  | -0.342351 | 0.204552  |
| 123 | 996.01                 | 0.694263       | 0.486621  | 0.097843  | -0.669246 | 123 | 999.86                 | 0.717921       | -0.634344 | -0.431682 | 0.359416  |
| 124 | 1011.42                | 4.071683       | -0.923473 | -1.548427 | -0.906231 | 124 | 1012.64                | 0.633827       | 0.21878   | -0.367237 | -0.67164  |
| 125 | 1018.41                | 2.267241       | -0.650093 | -1.252593 | -0.525004 | 125 | 1018.86                | 7.059717       | -1.650887 | -2.06947  | -0.227119 |
| 126 | 1019.57                | 3.11497        | -1.330212 | -1.038553 | 0.516636  | 126 | 1018.92                | 1.330346       | 0.570992  | -0.267525 | -0.965787 |
| 127 | 1020.64                | 2.20363        | 0.427342  | 1.303857  | 0.566537  | 127 | 1020.07                | 1.738887       | -0.197468 | 1.104974  | 0.692044  |
| 128 | 1020.92                | 1.802593       | -0.192418 | -0.242772 | 1.30638   | 128 | 1020.54                | 2.595244       | -0.26615  | -0.374338 | 1.544111  |
| 129 | 1050.87                | 1.08488        | 0.062181  | 0.895278  | 0.528669  | 129 | 1050.41                | 1.150271       | -0.000885 | -1.072493 | -0.005317 |
| 130 | 1061.67                | 6.753036       | 1.545173  | 1.995105  | -0.620511 | 130 | 1063.02                | 3.305036       | -0.88982  | -1.258948 | 0.963486  |
| 131 | 1069.62                | 3.480456       | 1.348942  | -0.015748 | 1.288628  | 131 | 1069.94                | 4.069563       | 0.675422  | -1.881148 | -0.273226 |
| 132 | 1069.69                | 5.954492       | 0.236885  | 2.24755   | 0.920271  | 132 | 1071.45                | 12.617167      | -1.012472 | -3.255352 | 0.99737   |
| 133 | 1072.86                | 4.146951       | -0.432359 | -1.9523   | 0.385411  | 133 | 1072.14                | 1.613475       | 0.526256  | 0.714606  | 0.908772  |
| 134 | 1077.08                | 2.911829       | -0.461167 | -0.893077 | 1.378974  | 134 | 1076.18                | 1.382302       | 0.784369  | -0.871473 | -0.087185 |
| 135 | 1077.36                | 3.299833       | -0.673165 | 1.679855  | -0.157388 | 135 | 1076.27                | 5.777359       | -1.272623 | -1.128066 | 1.698604  |
| 136 | 1083.42                | 13.495585      | -2.564035 | -0.065665 | 2.630018  | 136 | 1077.66                | 8.540931       | -2.543675 | -1.393074 | 0.360549  |
| 137 | 1085.99                | 58.935829      | -4.601398 | -5.937935 | -1.582368 | 137 | 1085.38                | 7.069521       | -1.913135 | -1.829262 | -0.251467 |
| 138 | 1089.19                | 27.920611      | -2.860324 | -2.537517 | 3.646939  | 138 | 1086.31                | 24.41262       | -2.944232 | -3.701848 | 1.428441  |
| 139 | 1094.53                | 11.461386      | 1.421933  | 2.73365   | 1.402374  | 139 | 1086.78                | 20.777119      | 1.403002  | 3.335127  | 2.772297  |
| 140 | 1106.02                | 4.380664       | 0.794814  | 0.610453  | 1.837467  | 140 | 1104.37                | 1.077616       | -0.073174 | -0.001524 | 1.0355    |
| 141 | 1112.63                | 0.82946        | -0.286481 | -0.855428 | 0.125029  | 141 | 1112.39                | 4.842594       | -0.901684 | -1.93215  | -0.544387 |
| 142 | 1113.24                | 4.265328       | -1.366717 | -1.441919 | 0.564164  | 142 | 1113.58                | 1.936378       | -0.966153 | -0.334137 | 0.944076  |
| 143 | 1145.97                | 0.046696       | 0.093747  | 0.03668   | 0.191212  | 143 | 1145.64                | 0.205213       | -0.006052 | 0.406472  | -0.199892 |
| 144 | 1146.29                | 0.337862       | -0.11716  | 0.523771  | -0.223157 | 144 | 1146.23                | 0.099355       | -0.168971 | 0.217127  | -0.153817 |
| 145 | 1147.34                | 0.134087       | -0.127505 | 0.036625  | 0.341304  | 145 | 1146.31                | 0.053142       | 0.077199  | -0.192575 | 0.100483  |
| 146 | 1147.43                | 0.094458       | 0.022565  | -0.303502 | -0.042841 | 146 | 1146.85                | 0.107561       | -0.016669 | -0.327126 | 0.016477  |

to be continued

Table S 5: Calculated Vibrational Frequencies - continued from above

| #   | freq /cm <sup>-1</sup> | T <sup>2</sup> | TX        | TY        | TZ        | #   | freq /cm <sup>-1</sup> | T <sup>2</sup> | TX        | TY        | TZ        |
|-----|------------------------|----------------|-----------|-----------|-----------|-----|------------------------|----------------|-----------|-----------|-----------|
| 147 | 1156.06                | 1.742761       | 0.545029  | 1.195674  | -0.126757 | 147 | 1161.48                | 1.639209       | 0.690337  | 1.076882  | -0.054475 |
| 148 | 1162.93                | 4.625154       | 1.030967  | 1.507788  | 1.135269  | 148 | 1164.27                | 4.772491       | -1.169574 | -1.487669 | -1.091526 |
| 149 | 1167.06                | 6.520655       | -2.269871 | -1.168343 | 0.057583  | 149 | 1166.85                | 5.041599       | -1.954398 | -1.087051 | -0.200617 |
| 150 | 1169.79                | 1.23727        | -0.431346 | 0.446492  | 0.922961  | 150 | 1169.22                | 0.28708        | -0.304513 | -0.335215 | 0.286326  |
| 151 | 1173.84                | 1.243174       | 0.328132  | 0.328643  | -1.013655 | 151 | 1172.45                | 0.966909       | 0.257404  | 0.239275  | -0.918368 |
| 152 | 1210.11                | 3.155652       | 1.696001  | 0.460152  | -0.259795 | 152 | 1209.71                | 1.996186       | -1.370966 | -0.335039 | 0.066246  |
| 153 | 1220.3                 | 4.807217       | -1.216836 | -1.577235 | -0.915891 | 153 | 1223.6                 | 7.902465       | 1.407824  | 2.382104  | 0.49606   |
| 154 | 1241.67                | 2.271974       | 0.583397  | 0.851052  | -1.098786 | 154 | 1247.29                | 0.968032       | -0.736537 | 0.576835  | -0.304642 |
| 155 | 1246.46                | 2.317467       | -1.490093 | 0.106679  | -0.29276  | 155 | 1247.94                | 1.611967       | -0.258239 | 0.000349  | 1.243093  |
| 156 | 1275.01                | 5.141324       | -1.598429 | 0.95022   | -1.29747  | 156 | 1275.06                | 5.84469        | -1.146526 | 2.068682  | 0.500721  |
| 157 | 1277.09                | 3.947656       | -1.163717 | 1.52377   | 0.521097  | 157 | 1276.47                | 3.855589       | -1.398908 | 1.169904  | -0.727991 |
| 158 | 1285.62                | 3.598225       | 0.634112  | -0.579585 | 1.691215  | 158 | 1284                   | 2.915778       | 0.540085  | -0.762942 | 1.428988  |
| 159 | 1287.06                | 2.615726       | -0.455922 | 1.481802  | 0.460571  | 159 | 1285.38                | 2.31573        | -0.267733 | 1.435139  | 0.429447  |
| 160 | 1297.34                | 3.142365       | -1.032915 | -0.802565 | -1.196386 | 160 | 1299.58                | 0.36077        | 0.141726  | 0.056703  | -0.58092  |
| 161 | 1311.59                | 0.86136        | -0.590865 | -0.453215 | -0.553926 | 161 | 1313.34                | 0.509283       | -0.532678 | -0.390775 | -0.269875 |
| 162 | 1314.56                | 6.209514       | -1.550947 | -1.463625 | -1.289139 | 162 | 1319.94                | 4.331166       | 1.130879  | 1.637931  | 0.607833  |
| 163 | 1330.3                 | 1.3156         | -0.301905 | -1.073505 | -0.268404 | 163 | 1332.19                | 3.534253       | -0.526896 | -1.767675 | -0.363262 |
| 164 | 1344.07                | 1.124655       | -0.53027  | 0.495236  | 0.773441  | 164 | 1338.12                | 1.477184       | 1.038606  | -0.557258 | -0.296557 |
| 165 | 1351.59                | 0.868516       | 0.385723  | -0.41565  | -0.739574 | 165 | 1350.17                | 0.643758       | 0.694286  | -0.130305 | -0.380454 |
| 166 | 1352.21                | 0.401932       | 0.311098  | -0.410724 | 0.369399  | 166 | 1351.6                 | 0.238935       | -0.199444 | 0.353148  | -0.272844 |
| 167 | 1356.83                | 1.480142       | 0.435977  | 0.861728  | 0.739926  | 167 | 1356.32                | 0.58387        | 0.063479  | -0.243257 | -0.721573 |
| 168 | 1357.67                | 0.62331        | 0.716965  | 0.083422  | -0.319864 | 168 | 1356.41                | 3.181627       | 0.878276  | 1.412058  | 0.645254  |
| 169 | 1373.68                | 5.004282       | -0.763832 | 2.02143   | -0.578501 | 169 | 1376.04                | 6.593236       | 0.178916  | 2.555329  | -0.177534 |
| 170 | 1383.57                | 2.842506       | 0.669778  | -0.484845 | 1.469295  | 170 | 1380.04                | 2.731509       | 1.194874  | 0.822497  | 0.792012  |
| 171 | 1390.52                | 4.799138       | 2.123551  | 0.445597  | 0.30185   | 171 | 1389.2                 | 9.711244       | -2.294132 | 0.580051  | -2.027744 |
| 172 | 1395.35                | 6.80681        | -0.973536 | 2.224898  | -0.953344 | 172 | 1389.37                | 1.87154        | -1.210105 | -0.094528 | 0.63107   |
| 173 | 1410.68                | 2.786104       | 1.258049  | -0.70174  | -0.843195 | 173 | 1411.49                | 2.876044       | -1.606908 | 0.32903   | 0.430849  |
| 174 | 1416.73                | 11.721971      | 1.778241  | -2.864107 | -0.59726  | 174 | 1415.79                | 12.226149      | -1.741097 | 3.004615  | 0.408683  |
| 175 | 1417.04                | 15.620708      | 2.93668   | -2.159592 | 1.527343  | 175 | 1417.35                | 13.722207      | -2.724205 | 2.397576  | -0.743333 |
| 176 | 1420.86                | 10.992035      | 0.630301  | 1.894885  | 2.646538  | 176 | 1419.88                | 7.096784       | -1.083693 | -1.943909 | -1.464107 |
| 177 | 1421.53                | 10.70893       | -0.335146 | -0.196653 | -3.249298 | 177 | 1420.41                | 9.166556       | -0.403063 | -0.045255 | -3.000341 |
| 178 | 1423.39                | 3.751358       | -1.174997 | -1.457225 | 0.497229  | 178 | 1424.42                | 5.328839       | -1.023908 | -2.064504 | 0.135186  |
| 179 | 1458.72                | 4.576131       | 1.559103  | 0.661687  | -1.306713 | 179 | 1457.47                | 11.337477      | 2.61474   | 1.451814  | -1.546884 |
| 180 | 1459.4                 | 8.47584        | -1.689948 | -2.367504 | -0.121818 | 180 | 1460.18                | 9.777348       | 1.719368  | 2.552035  | 0.555194  |

to be continued

Table S 5: Calculated Vibrational Frequencies - continued from above

| #   | freq /cm <sup>-1</sup> | T <sup>2</sup> | TX        | TY         | TZ         | #   | freq /cm <sup>-1</sup> | T <sup>2</sup> | TX        | TY        | TZ        |
|-----|------------------------|----------------|-----------|------------|------------|-----|------------------------|----------------|-----------|-----------|-----------|
| 181 | 1463.36                | 7.122631       | -0.379145 | -0.975057  | 2.455228   | 181 | 1461.24                | 11.994915      | -0.002177 | -2.615903 | -2.269793 |
| 182 | 1463.53                | 9.083324       | 0.051553  | 1.968289   | 2.281776   | 182 | 1461.95                | 11.270521      | -0.28322  | -0.454639 | 3.314153  |
| 183 | 1571.93                | 37.602824      | -3.662055 | -2.173973  | -4.412031  | 183 | 1518.26                | 23.426923      | 2.119701  | 4.304919  | -0.633614 |
| 184 | 1575.61                | 0.72434        | 0.272822  | 0.318536   | -0.740569  | 184 | 1573.15                | 1.071921       | 0.247196  | 0.653769  | -0.763807 |
| 185 | 1576.91                | 1.252977       | 0.484708  | -0.963604  | 0.299169   | 185 | 1575.68                | 0.855425       | -0.591705 | 0.71083   | -0.005527 |
| 186 | 1579.84                | 2.119976       | -0.619341 | 1.001018   | 0.856945   | 186 | 1576.47                | 0.275515       | -0.316777 | -0.296738 | -0.295151 |
| 187 | 1580.12                | 2.954661       | 1.052461  | 1.070781   | 0.836907   | 187 | 1578.88                | 1.664219       | -0.379363 | -1.226305 | -0.128364 |
| 188 | 1592.37                | 0.392388       | -0.503641 | 0.005195   | -0.372434  | 188 | 1590.28                | 3.771794       | -1.241598 | -1.27047  | -0.784942 |
| 189 | 1592.77                | 0.536512       | 0.3059    | -0.553418  | 0.369683   | 189 | 1591.03                | 14.55969       | -1.507891 | 1.986785  | 2.88767   |
| 190 | 1593.59                | 3.222829       | -0.340174 | -0.142319  | -1.756945  | 190 | 1591.85                | 1.919282       | 0.261125  | -0.084678 | 1.357912  |
| 191 | 1594.49                | 0.799963       | -0.205169 | 0.730671   | 0.473274   | 191 | 1592.75                | 2.836694       | -1.062729 | 0.04279   | -1.305937 |
| 192 | 1798.94                | 785.561976     | -3.626557 | -14.595683 | 23.651133  | 192 | 1826.39                | 835.206922     | -9.664823 | -3.289313 | 27.036615 |
| 193 | 1894.1                 | 765.521143     | 10.622767 | -22.826066 | -11.473827 | 193 | 1868.75                | 1013.6394      | 7.77541   | NaN       | NaN       |
| 194 | 2910.61                | 47.572845      | 5.752637  | 0.600581   | 3.757568   | 194 | 2926.03                | 11.854584      | 1.699565  | -2.678365 | 1.338815  |
| 195 | 2939.12                | 12.964323      | -2.177099 | 2.43499    | -1.515053  | 195 | 2926.98                | 24.737126      | -3.996096 | 0.374225  | -2.937397 |
| 196 | 2949.97                | 42.307426      | 5.194307  | 3.465818   | -1.820633  | 196 | 2952                   | 40.847146      | 4.882875  | 3.780396  | -1.647204 |
| 197 | 2959.4                 | 10.680682      | -2.308431 | -1.600163  | 1.670721   | 197 | 2969.6                 | 21.512933      | 1.718346  | 3.917764  | 1.792022  |
| 198 | 2971.21                | 39.594639      | 0.945015  | 3.684762   | 5.012396   | 198 | 2972.65                | 9.315874       | 1.421067  | -2.612259 | -0.68742  |
| 199 | 2978.87                | 10.285206      | -2.268606 | 2.152751   | 0.710137   | 199 | 2977.4                 | 17.394916      | -0.342311 | 2.598525  | 3.244288  |
| 200 | 2986.11                | 9.387359       | 1.92126   | 1.241025   | 2.038621   | 200 | 2984.37                | 10.201818      | 2.334105  | 0.980816  | 1.947247  |
| 201 | 3002.2                 | 17.163071      | -1.493494 | -2.755281  | 2.709423   | 201 | 2996.98                | 15.651929      | -2.020866 | -1.607428 | 2.997367  |
| 202 | 3008.17                | 44.762229      | -0.590327 | -6.478382  | -1.563429  | 202 | 3000.13                | 9.829393       | 3.010624  | -0.874765 | 0.017988  |
| 203 | 3020.66                | 7.42105        | -2.70391  | -0.060425  | -0.325992  | 203 | 3010.34                | 48.972078      | -0.323191 | -6.988639 | -0.16293  |
| 204 | 3023.16                | 32.906316      | -5.621709 | -0.697079  | -0.90376   | 204 | 3026.62                | 29.071591      | 5.078953  | 0.971616  | 1.527019  |
| 205 | 3041.5                 | 1.873562       | 1.194176  | -0.42614   | 0.515666   | 205 | 3037.7                 | 3.249514       | 1.781437  | -0.128431 | -0.243928 |
| 206 | 3049.94                | 2.10984        | -0.583232 | -0.290483  | 1.298191   | 206 | 3047.68                | 2.883461       | -0.074007 | -0.707049 | 1.542098  |
| 207 | 3095.19                | 0.266891       | -0.011639 | 0.500013   | -0.129393  | 207 | 3086.83                | 0.377386       | -0.218323 | -0.119759 | 0.561586  |
| 208 | 3095.62                | 0.972594       | 0.248062  | 0.813395   | 0.499448   | 208 | 3096.08                | 0.187283       | 0.194152  | 0.385734  | -0.028228 |
| 209 | 3097.9                 | 0.402989       | -0.058825 | 0.151747   | 0.613597   | 209 | 3097.07                | 0.901354       | -0.075321 | -0.124469 | -0.938183 |
| 210 | 3097.94                | 0.196651       | 0.109526  | -0.385792  | -0.189263  | 210 | 3097.17                | 1.299184       | 0.271703  | 0.854146  | 0.704128  |
| 211 | 3103.1                 | 0.758662       | -0.5647   | 0.007681   | -0.663112  | 211 | 3097.73                | 0.990684       | 0.398244  | -0.672508 | -0.616294 |
| 212 | 3104.35                | 1.827436       | 0.296903  | 1.317406   | -0.061051  | 212 | 3103.78                | 1.603723       | -0.455679 | 0.365934  | -1.123464 |
| 213 | 3106.67                | 3.362657       | 1.142247  | -1.428236  | -0.134424  | 213 | 3104.48                | 2.53844        | 0.711264  | 1.39682   | 0.285372  |
| 214 | 3107.11                | 3.567799       | -1.034873 | 0.652452   | 1.439147   | 214 | 3105.65                | 3.161561       | -0.495817 | 1.684032  | -0.282425 |

to be continued



Table S 5: Calculated Vibrational Frequencies - continued from above

| #   | freq /cm <sup>-1</sup> | T <sup>2</sup> | TX        | TY        | TZ        | #   | freq /cm <sup>-1</sup> | T <sup>2</sup> | TX        | TY        | TZ        |
|-----|------------------------|----------------|-----------|-----------|-----------|-----|------------------------|----------------|-----------|-----------|-----------|
| 215 | 3113.43                | 10.611818      | 0.656468  | -3.128729 | 0.626036  | 215 | 3107.65                | 4.02042        | -1.148677 | 0.561813  | 1.544451  |
| 216 | 3113.74                | 0.761316       | 0.459873  | -0.658724 | -0.340463 | 216 | 3112.32                | 7.855803       | -1.877081 | 1.237031  | -1.673955 |
| 217 | 3114.16                | 13.673972      | 2.324381  | -0.472249 | 2.836936  | 217 | 3112.77                | 6.263462       | 0.233228  | 2.489264  | -0.112398 |
| 218 | 3114.97                | 7.225748       | 0.534769  | 1.216307  | -2.336743 | 218 | 3114.07                | 11.533625      | 0.851659  | -0.312385 | -3.272723 |
| 219 | 3119.68                | 6.063479       | -1.545876 | 1.053493  | 1.601217  | 219 | 3115.16                | 3.357408       | 0.039257  | 1.680846  | 0.728439  |
| 220 | 3122.19                | 14.813818      | -1.701141 | 1.505303  | 3.107089  | 220 | 3118.16                | 6.709294       | -2.342217 | 0.537251  | -0.966785 |
| 221 | 3123.01                | 11.780215      | -1.148316 | -2.78523  | -1.644409 | 221 | 3120.3                 | 8.677386       | -0.700714 | 2.809906  | 0.53927   |
| 222 | 3124.01                | 14.306782      | 0.899336  | 2.31346   | 2.854099  | 222 | 3121.14                | 8.659738       | -2.183342 | 0.666142  | 1.857151  |
| 223 | 3126                   | 22.881158      | -3.300488 | -2.29716  | 2.590558  | 223 | 3122.39                | 11.118474      | -0.664781 | -0.922166 | -3.134669 |
| 224 | 3126.18                | 0.60408        | -0.620722 | 0.362506  | 0.29559   | 224 | 3125.43                | 15.264047      | -0.110628 | -0.209361 | -3.899741 |
| 225 | 3127.13                | 10.900259      | -0.326444 | 2.226066  | -2.416263 | 225 | 3125.88                | 24.947386      | 1.901263  | 4.612018  | 0.24875   |
| 226 | 3131.96                | 17.615125      | -1.610958 | -3.782266 | -0.845223 | 226 | 3126.52                | 17.572851      | -2.767831 | -2.254288 | 2.19776   |
| 227 | 3133.96                | 3.618133       | 0.277918  | -1.718858 | 0.765781  | 227 | 3127.98                | 7.967542       | 0.081891  | -2.81253  | -0.224741 |

End of Table

Table S 6: Coordinates for Geometry Optimized Structures **1**CH<sub>2</sub>

| Spin-Multiplicity: 1 |           |           |          | Spin-Multiplicity: 3 |           |           |          |
|----------------------|-----------|-----------|----------|----------------------|-----------|-----------|----------|
| Element              | x         | y         | z        | Element              | x         | y         | z        |
| 'Mo'                 | 8.870072  | 7.409622  | 5.040581 | 'Mo'                 | 9.054568  | 7.340275  | 4.901722 |
| 'S'                  | 10.353091 | 8.540304  | 6.645292 | 'S'                  | 10.531706 | 8.750428  | 6.971966 |
| 'S'                  | 9.006643  | 9.715641  | 3.883088 | 'S'                  | 9.471296  | 9.495169  | 3.797375 |
| 'P'                  | 7.04998   | 6.886663  | 3.417383 | 'P'                  | 7.078743  | 6.918742  | 3.378796 |
| 'P'                  | 6.823366  | 8.479207  | 6.115209 | 'P'                  | 7.059605  | 8.492399  | 6.128411 |
| 'O'                  | 10.380008 | 5.408207  | 3.137169 | 'O'                  | 10.381014 | 5.576533  | 2.661023 |
| 'O'                  | 8.794562  | 4.97834   | 7.003512 | 'O'                  | 9.054062  | 4.860106  | 6.869764 |
| 'C'                  | 9.822191  | 6.1902    | 3.814963 | 'C'                  | 9.926843  | 6.262698  | 3.506426 |
| 'C'                  | 11.083454 | 7.646824  | 5.295485 | 'C'                  | 11.124407 | 7.604911  | 5.736047 |
| 'H'                  | 11.611136 | 8.309656  | 4.587557 | 'H'                  | 11.867173 | 8.067191  | 5.058877 |
| 'H'                  | 11.668889 | 6.773664  | 5.629225 | 'H'                  | 11.565949 | 6.748633  | 6.279603 |
| 'C'                  | 10.480831 | 10.258582 | 6.168384 | 'C'                  | 10.540212 | 10.360601 | 6.230665 |
| 'C'                  | 8.77859   | 5.88531   | 6.234072 | 'C'                  | 8.993434  | 5.753904  | 6.104671 |

to be continued

Table S 6: Coordinates for Geometry Optimized Structures - continued from above

| Element | x         | y         | z         | Element | x         | y         | z         |
|---------|-----------|-----------|-----------|---------|-----------|-----------|-----------|
| 'C'     | 11.274027 | 11.102123 | 7.143949  | 'C'     | 11.057935 | 11.411336 | 7.197509  |
| 'H'     | 10.918376 | 10.909637 | 8.181221  | 'H'     | 10.555602 | 11.272011 | 8.180965  |
| 'H'     | 12.343519 | 10.783291 | 7.127446  | 'H'     | 12.138638 | 11.211549 | 7.385047  |
| 'C'     | 11.168873 | 12.602463 | 6.824677  | 'C'     | 10.865676 | 12.85332  | 6.705113  |
| 'H'     | 11.952381 | 13.158462 | 7.380422  | 'H'     | 11.50237  | 13.53673  | 7.304304  |
| 'H'     | 10.186485 | 12.978922 | 7.181172  | 'H'     | 9.812691  | 13.160869 | 6.875943  |
| 'C'     | 11.277684 | 12.849572 | 5.315611  | 'C'     | 11.181625 | 12.959542 | 5.210611  |
| 'H'     | 11.262377 | 13.936768 | 5.091203  | 'H'     | 11.100271 | 14.009255 | 4.859201  |
| 'H'     | 12.251589 | 12.459255 | 4.943224  | 'H'     | 12.230799 | 12.637481 | 5.024467  |
| 'C'     | 10.128898 | 12.149695 | 4.574405  | 'C'     | 10.222023 | 12.068384 | 4.411777  |
| 'H'     | 10.276201 | 12.200195 | 3.474844  | 'H'     | 10.511574 | 12.034049 | 3.339989  |
| 'H'     | 9.167673  | 12.676371 | 4.776305  | 'H'     | 9.196783  | 12.506976 | 4.432977  |
| 'C'     | 9.944992  | 10.697731 | 4.989972  | 'C'     | 10.126339 | 10.647161 | 4.950036  |
| 'C'     | 5.430075  | 7.680794  | 3.897975  | 'C'     | 5.557491  | 7.891406  | 3.871448  |
| 'H'     | 4.851897  | 7.902496  | 2.97921   | 'H'     | 5.01146   | 8.223313  | 2.96648   |
| 'H'     | 4.870899  | 6.901258  | 4.453881  | 'H'     | 4.903601  | 7.179671  | 4.414404  |
| 'C'     | 5.641496  | 8.922529  | 4.764736  | 'C'     | 5.930465  | 9.071974  | 4.770354  |
| 'H'     | 4.691078  | 9.289072  | 5.201115  | 'H'     | 5.031838  | 9.541173  | 5.219216  |
| 'H'     | 6.114096  | 9.741604  | 4.187327  | 'H'     | 6.487529  | 9.845039  | 4.203299  |
| 'C'     | 7.396239  | 7.526273  | 1.735511  | 'C'     | 7.394489  | 7.444836  | 1.652878  |
| 'C'     | 6.975736  | 8.811991  | 1.332215  | 'C'     | 7.227189  | 8.794258  | 1.268887  |
| 'H'     | 6.374202  | 9.44339   | 2.001238  | 'H'     | 6.850049  | 9.537591  | 1.986243  |
| 'C'     | 7.32967   | 9.308108  | 0.065314  | 'C'     | 7.551408  | 9.206152  | -0.034388 |
| 'H'     | 6.993328  | 10.311686 | -0.237699 | 'H'     | 7.411549  | 10.259781 | -0.321733 |
| 'C'     | 8.108448  | 8.529806  | -0.807894 | 'C'     | 8.054087  | 8.27941   | -0.965579 |
| 'H'     | 8.384704  | 8.920695  | -1.799416 | 'H'     | 8.309363  | 8.6045    | -1.986073 |
| 'C'     | 8.530959  | 7.2468    | -0.411205 | 'C'     | 8.228064  | 6.935512  | -0.587644 |
| 'H'     | 9.136452  | 6.62805   | -1.091505 | 'H'     | 8.618374  | 6.203115  | -1.311292 |
| 'C'     | 8.177888  | 6.747355  | 0.851834  | 'C'     | 7.900316  | 6.518602  | 0.712988  |
| 'H'     | 8.506778  | 5.74015   | 1.149504  | 'H'     | 8.034946  | 5.464324  | 0.997313  |
| 'C'     | 6.531102  | 5.160336  | 3.078774  | 'C'     | 6.428655  | 5.218768  | 3.1624    |
| 'C'     | 7.037726  | 4.088984  | 3.840178  | 'C'     | 7.108551  | 4.109889  | 3.703645  |
| 'H'     | 7.79235   | 4.283072  | 4.615394  | 'H'     | 8.048849  | 4.266356  | 4.252013  |
| 'C'     | 6.584606  | 2.777825  | 3.607027  | 'C'     | 6.589508  | 2.812442  | 3.545094  |

to be continued

Table S 6: Coordinates for Geometry Optimized Structures - continued from above

| Element | x        | y         | z        | Element | x        | y         | z         |
|---------|----------|-----------|----------|---------|----------|-----------|-----------|
| 'H'     | 6.989488 | 1.947201  | 4.205314 | 'H'     | 7.129112 | 1.953497  | 3.972802  |
| 'C'     | 5.622755 | 2.531418  | 2.612717 | 'C'     | 5.387167 | 2.615851  | 2.844591  |
| 'H'     | 5.268291 | 1.505123  | 2.429809 | 'H'     | 4.978463 | 1.600656  | 2.72324   |
| 'C'     | 5.115843 | 3.59831   | 1.845292 | 'C'     | 4.707365 | 3.719086  | 2.293149  |
| 'H'     | 4.365613 | 3.408352  | 1.062091 | 'H'     | 3.768289 | 3.568902  | 1.738183  |
| 'C'     | 5.569161 | 4.906466  | 2.073364 | 'C'     | 5.226805 | 5.013836  | 2.445474  |
| 'H'     | 5.179015 | 5.734173  | 1.460468 | 'H'     | 4.695708 | 5.867712  | 1.996955  |
| 'C'     | 5.738373 | 7.498138  | 7.226227 | 'C'     | 5.89006  | 7.456306  | 7.10196   |
| 'C'     | 5.613163 | 6.10785   | 7.010173 | 'C'     | 5.793359 | 6.073123  | 6.831234  |
| 'H'     | 6.229329 | 5.615015  | 6.243884 | 'H'     | 6.466297 | 5.608107  | 6.096747  |
| 'C'     | 4.711304 | 5.346556  | 7.772688 | 'C'     | 4.835907 | 5.279639  | 7.485376  |
| 'H'     | 4.624248 | 4.264193  | 7.591706 | 'H'     | 4.775466 | 4.20416   | 7.258269  |
| 'C'     | 3.933188 | 5.964215  | 8.767451 | 'C'     | 3.965647 | 5.857155  | 8.426098  |
| 'H'     | 3.233219 | 5.366637  | 9.371818 | 'H'     | 3.219493 | 5.235504  | 8.944811  |
| 'C'     | 4.0527   | 7.348683  | 8.989645 | 'C'     | 4.05128  | 7.234863  | 8.700468  |
| 'H'     | 3.444687 | 7.838499  | 9.76608  | 'H'     | 3.3697   | 7.696102  | 9.432114  |
| 'C'     | 4.944542 | 8.114202  | 8.220501 | 'C'     | 5.000791 | 8.031327  | 8.039808  |
| 'H'     | 5.023513 | 9.197489  | 8.39742  | 'H'     | 5.048687 | 9.108909  | 8.257117  |
| 'C'     | 7.160552 | 10.014881 | 7.03269  | 'C'     | 7.291838 | 9.97854   | 7.161382  |
| 'C'     | 7.76779  | 9.907278  | 8.305377 | 'C'     | 7.743686 | 9.810397  | 8.491747  |
| 'H'     | 7.948705 | 8.913927  | 8.745577 | 'H'     | 7.89471  | 8.797066  | 8.894823  |
| 'C'     | 8.141667 | 11.059568 | 9.012189 | 'C'     | 7.990381 | 10.925768 | 9.305757  |
| 'H'     | 8.612207 | 10.96418  | 10.00266 | 'H'     | 8.337216 | 10.779634 | 10.340336 |
| 'C'     | 7.919657 | 12.331512 | 8.451854 | 'C'     | 7.797371 | 12.225606 | 8.800818  |
| 'H'     | 8.216721 | 13.236449 | 9.003707 | 'H'     | 7.994445 | 13.101428 | 9.437775  |
| 'C'     | 7.32387  | 12.442888 | 7.184276 | 'C'     | 7.363285 | 12.399858 | 7.475615  |
| 'H'     | 7.156249 | 13.435192 | 6.738031 | 'H'     | 7.214635 | 13.412589 | 7.070345  |
| 'C'     | 6.94401  | 11.291043 | 6.473734 | 'C'     | 7.118377 | 11.284652 | 6.655668  |
| 'H'     | 6.493475 | 11.398675 | 5.477689 | 'H'     | 6.794296 | 11.448454 | 5.618416  |

End of Table

## References

- [1] B. J. Elvers, C. Schulzke and C. Fischer, *Eur. J. Inorg. Chem.*, 2019, **2019**, 2796–2805.
- [2] A. K. Bhattacharya and A. G. Hortmann, *J. Org. Chem.*, 1974, **39**, 95–97.
- [3] H. Sugimoto, M. Harihara, M. Shiro, K. Sugimoto, K. Tanaka, H. Miyake and H. Tsukube, *Inorg. Chem.*, 2005, **44**, 6386–6392.
- [4] G. M. Sheldrick, *Acta Crystallogr. Sect. Found. Crystallogr.*, 2007, **64**, 112–122.
- [5] L. J. Farrugia, *J. Appl. Crystallogr.*, 2012, **45**, 849–854.
- [6] O. V. Dolomanov, L. J. Bourhis, R. J. Gildea, J. A. K. Howard and H. Puschmann, *J. Appl. Crystallogr.*, 2009, **42**, 339–341.
- [7] G. M. Sheldrick, *Acta Crystallogr. Sect. C Cryst. Struct. Commun.*, 2015, **71**, 3–8.
- [8] G. M. Sheldrick, *Acta Crystallogr. Sect. Found. Crystallogr.*, 2015, **71**, 3–8.
- [9] F. Neese, *WIREs Comput. Mol. Sci.*, 2011, **2**, 73–78.
- [10] A. D. Becke, *Phys. Rev. A*, 1988, **38**, 3098–3100.
- [11] J. P. Perdew, *Phys. Rev. B*, 1986, **33**, 8822–8824.
- [12] F. Neese, *J. Comput. Chem.*, 2003, **24**, 1740–1747.
- [13] F. Weigend and R. Ahlrichs, *Phys. Chem. Chem. Phys.*, 2005, **7**, 3297.
- [14] D. Andrae, U. Häußermann, M. Dolg, H. Stoll and H. Preuß, *Theor. Chim. Acta*, 1990, **77**, 123–141.
- [15] F. Weigend, *Phys. Chem. Chem. Phys.*, 2006, **8**, 1057.
- [16] S. Grimme, J. Antony, S. Ehrlich and H. Krieg, *J. Chem. Phys.*, 2010, **132**, 154104.
- [17] V. Barone and M. Cossi, *J. Phys. Chem. A*, 1998, **102**, 1995–2001.
